# Supplementary material for: Chronic integrated stress response causes dysregulated cholesterol synthesis in white matter disease
Source: JCI journal article supplement (doi:10.1172/jci.insight.188459), 2025-07-15

Full unedited  
blot for Figure 1A

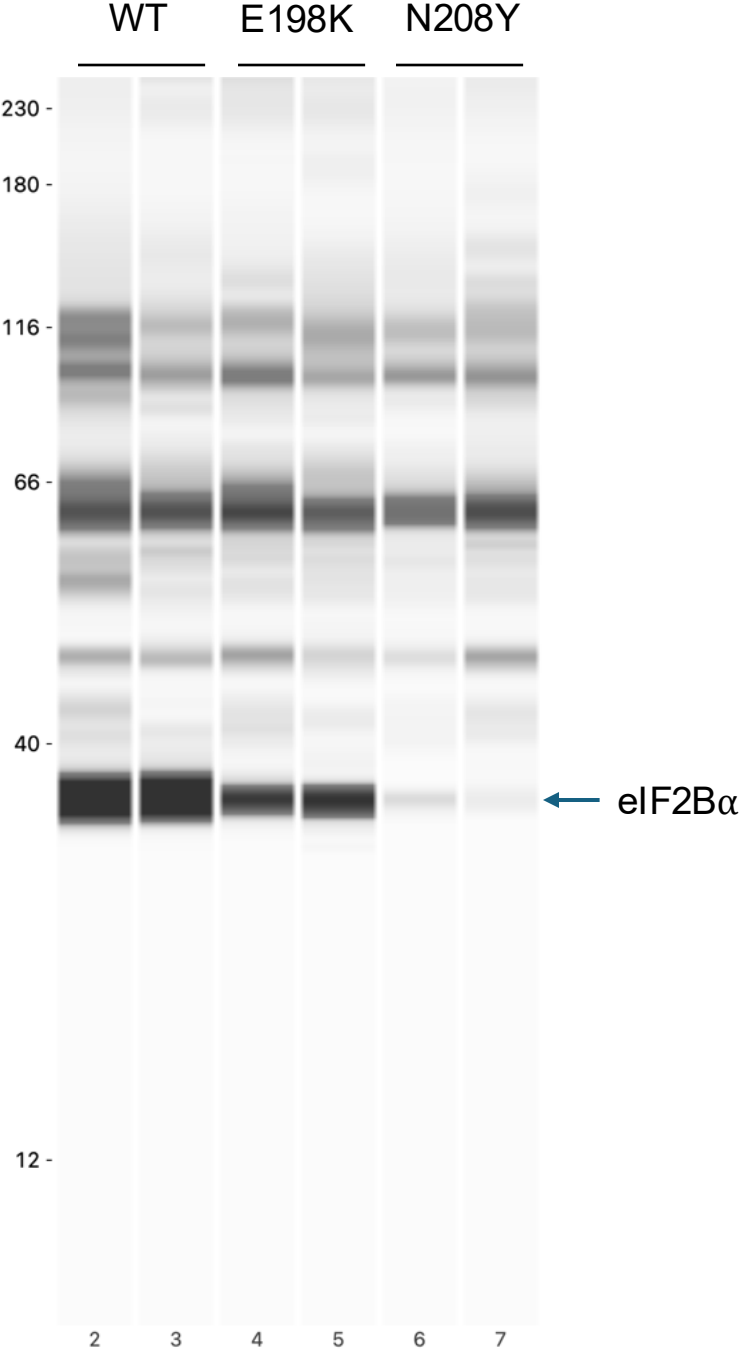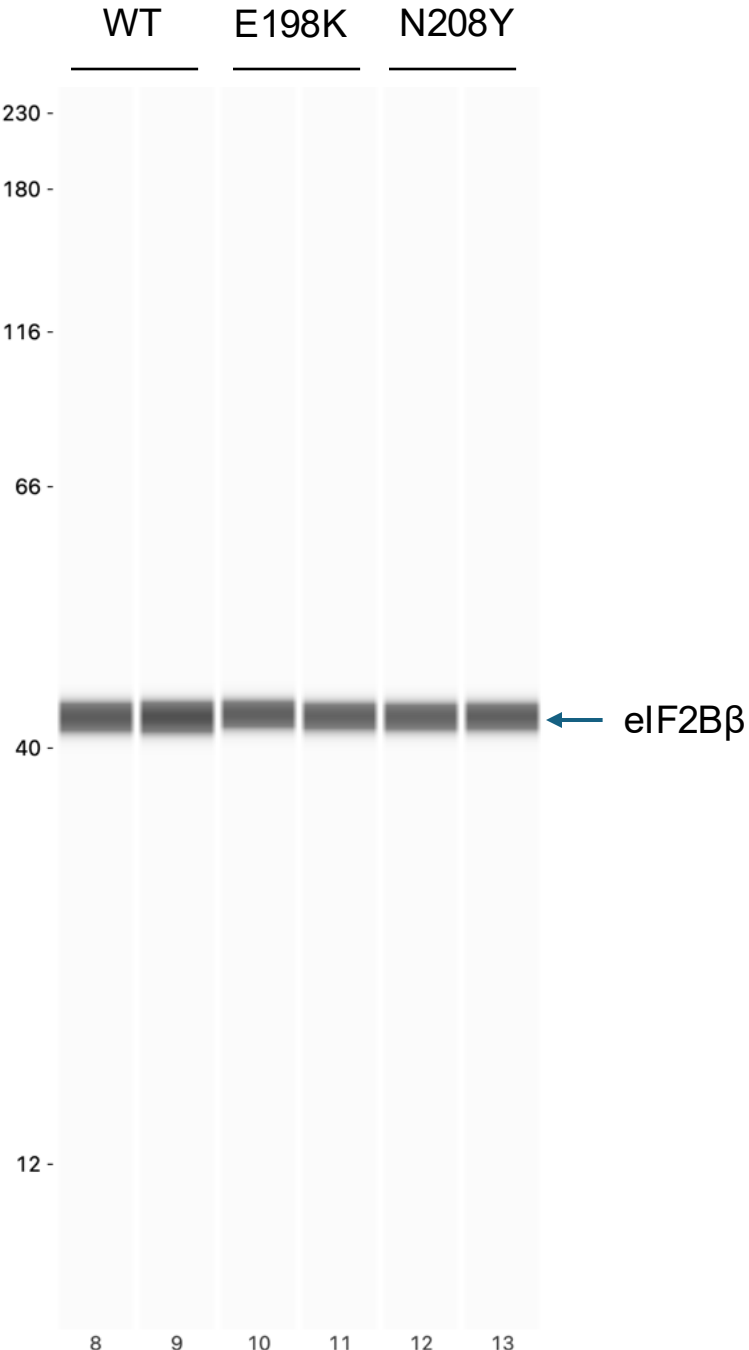

Full unedited  
blot for Figure 1A

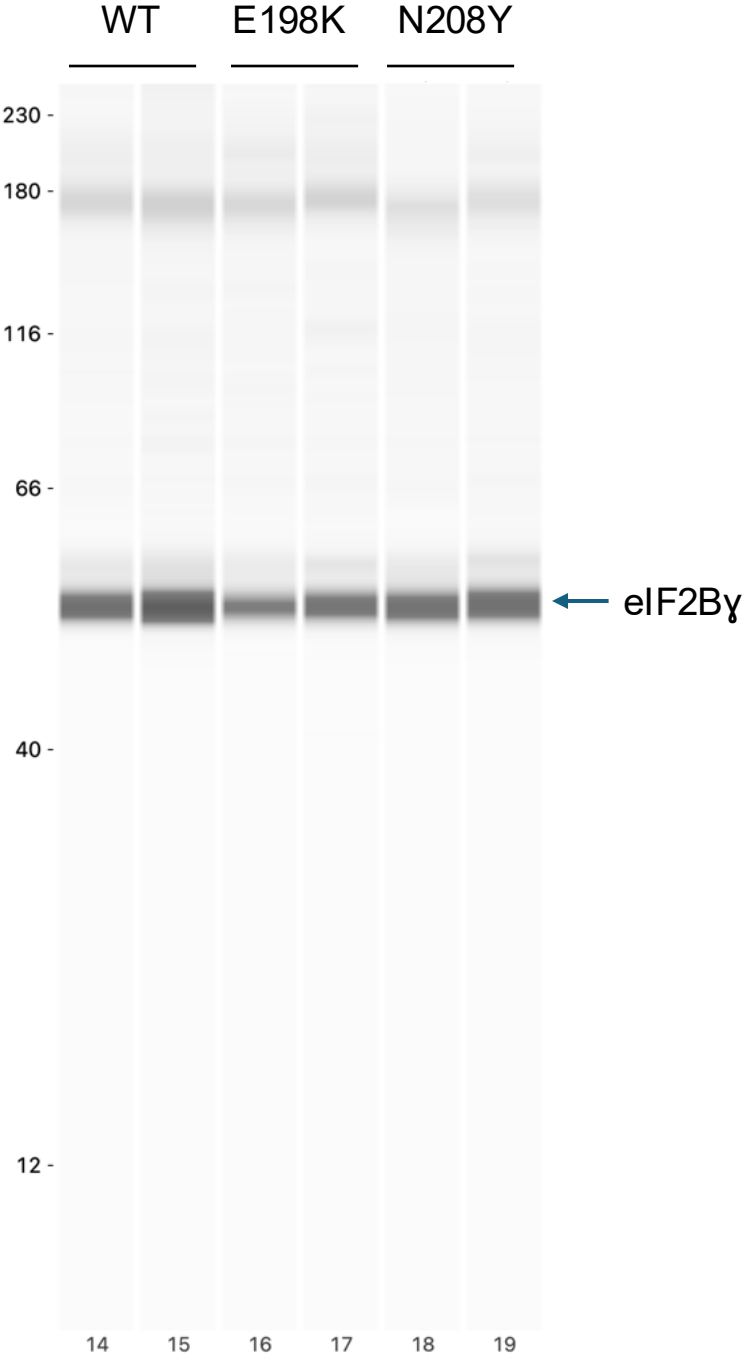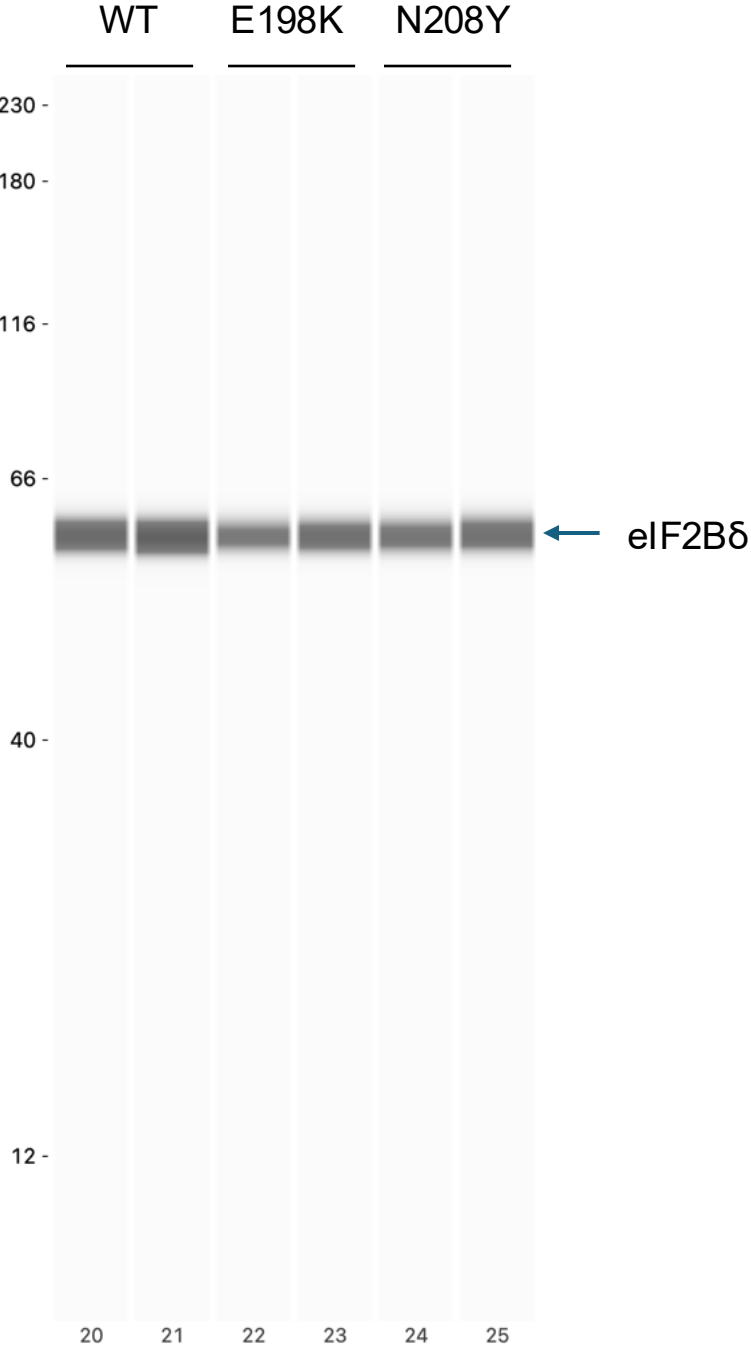

Full unedited  
blot for Figure 1A

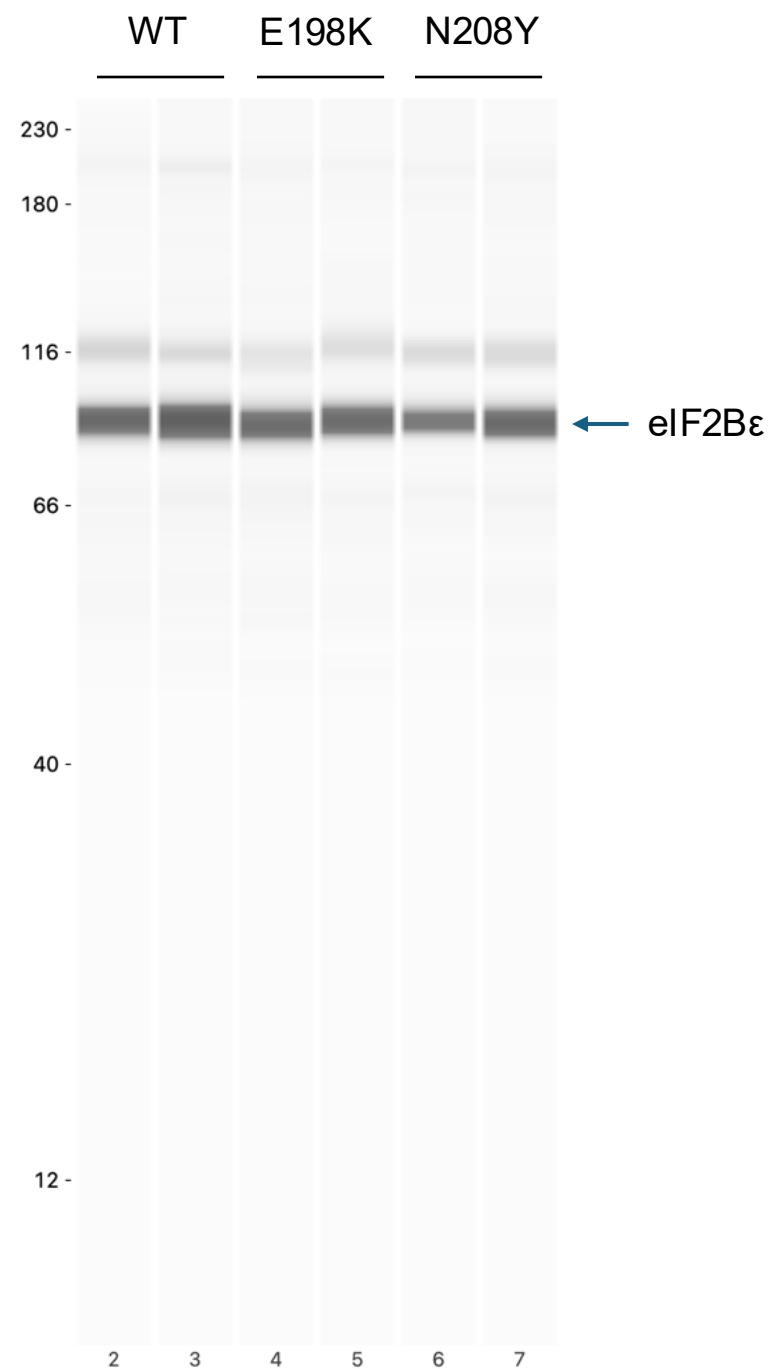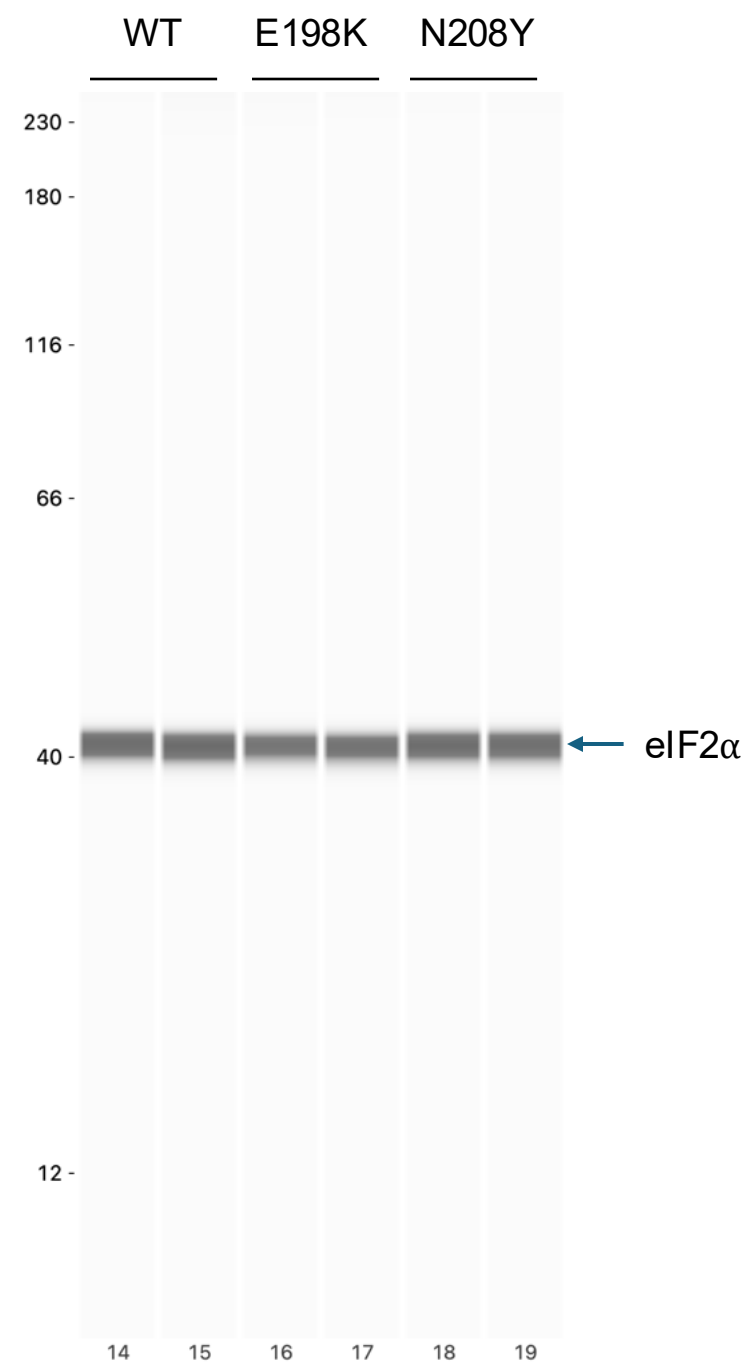

Full unedited  
blot for Figure 1F

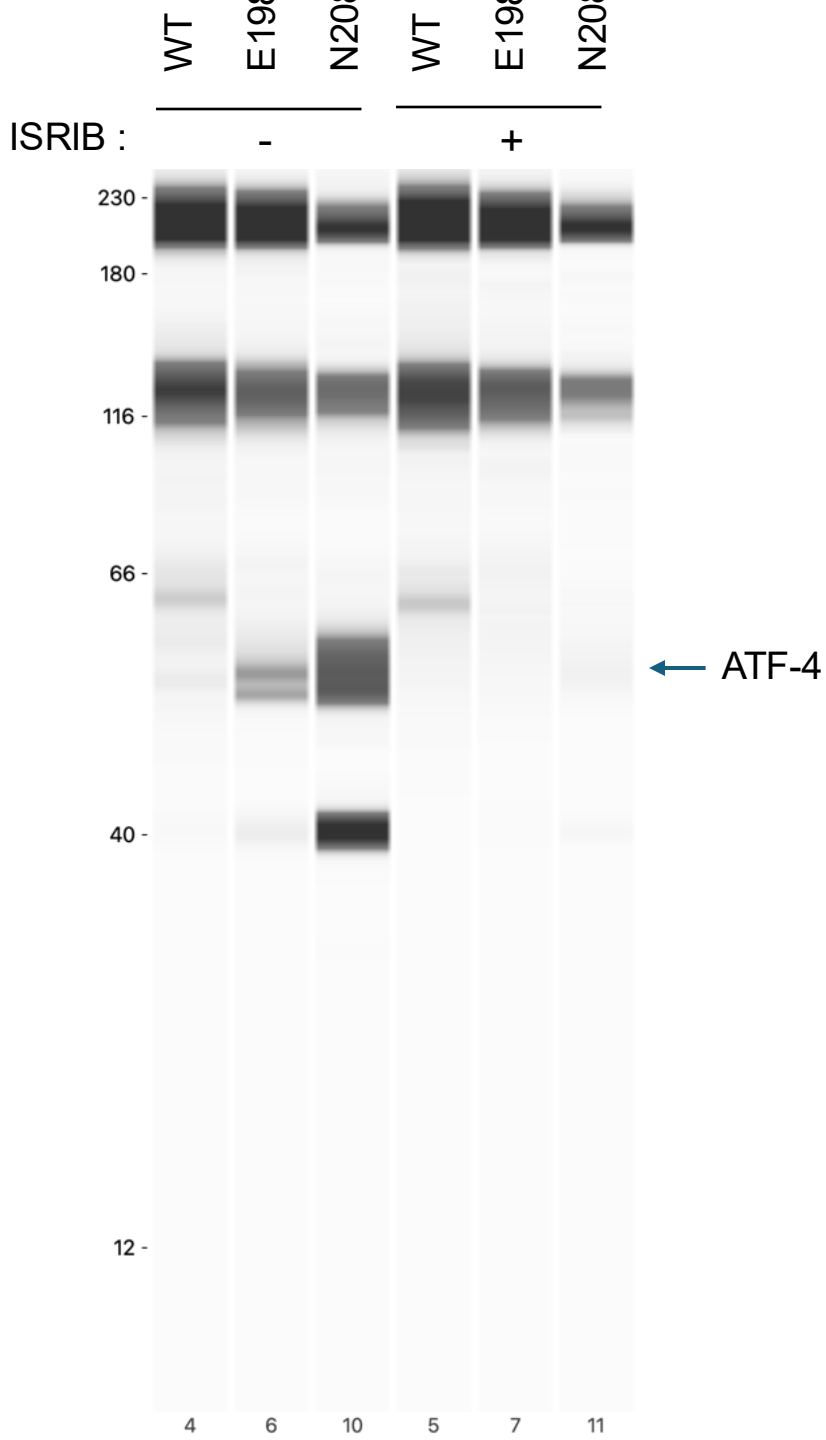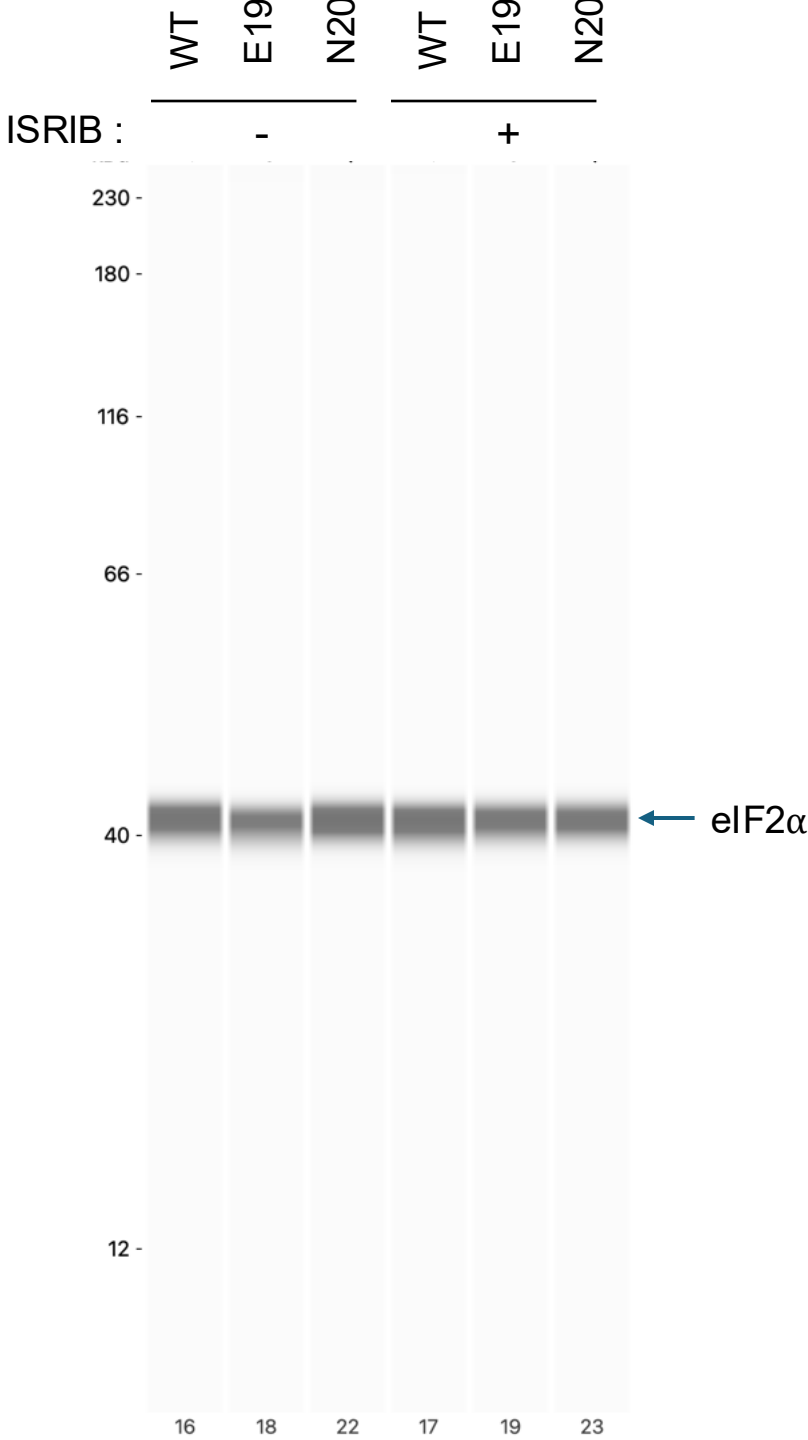

Full unedited  
blot for Figure 2F

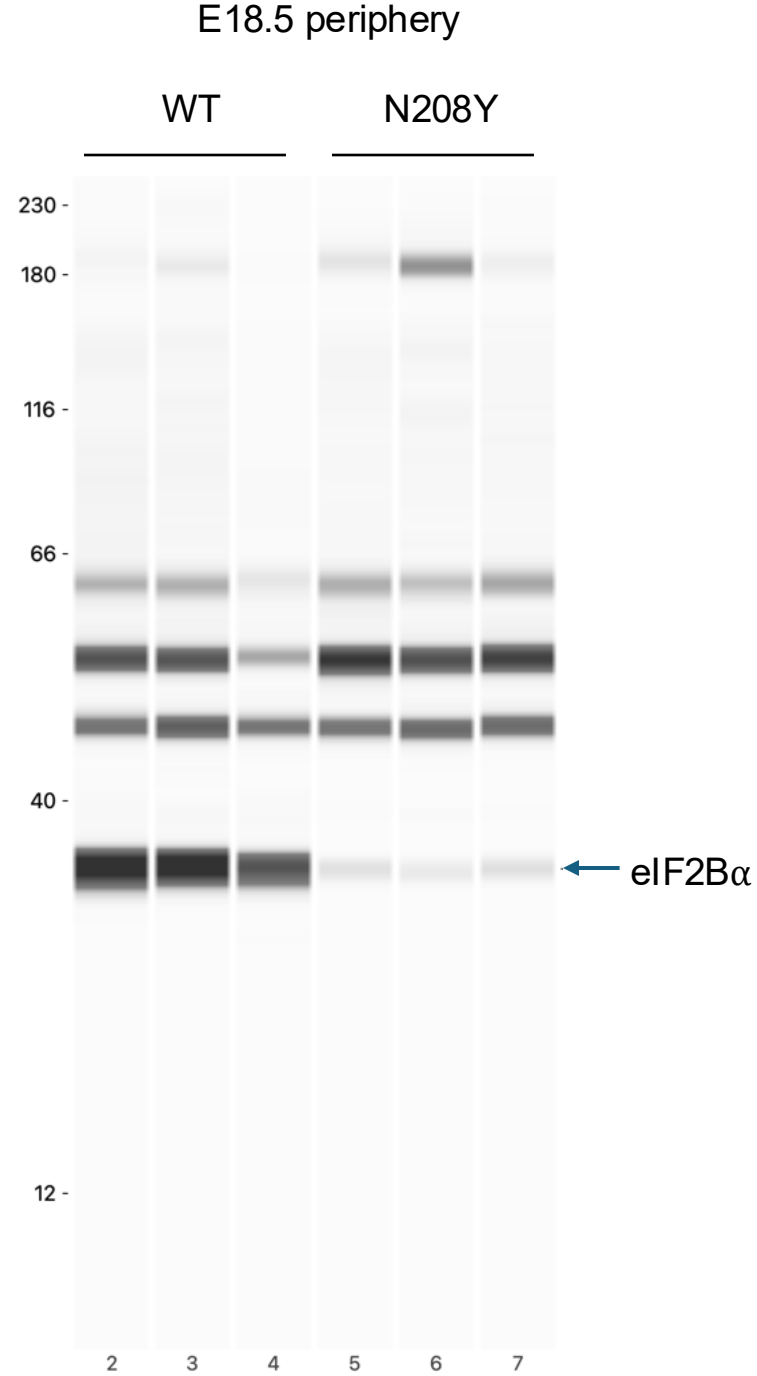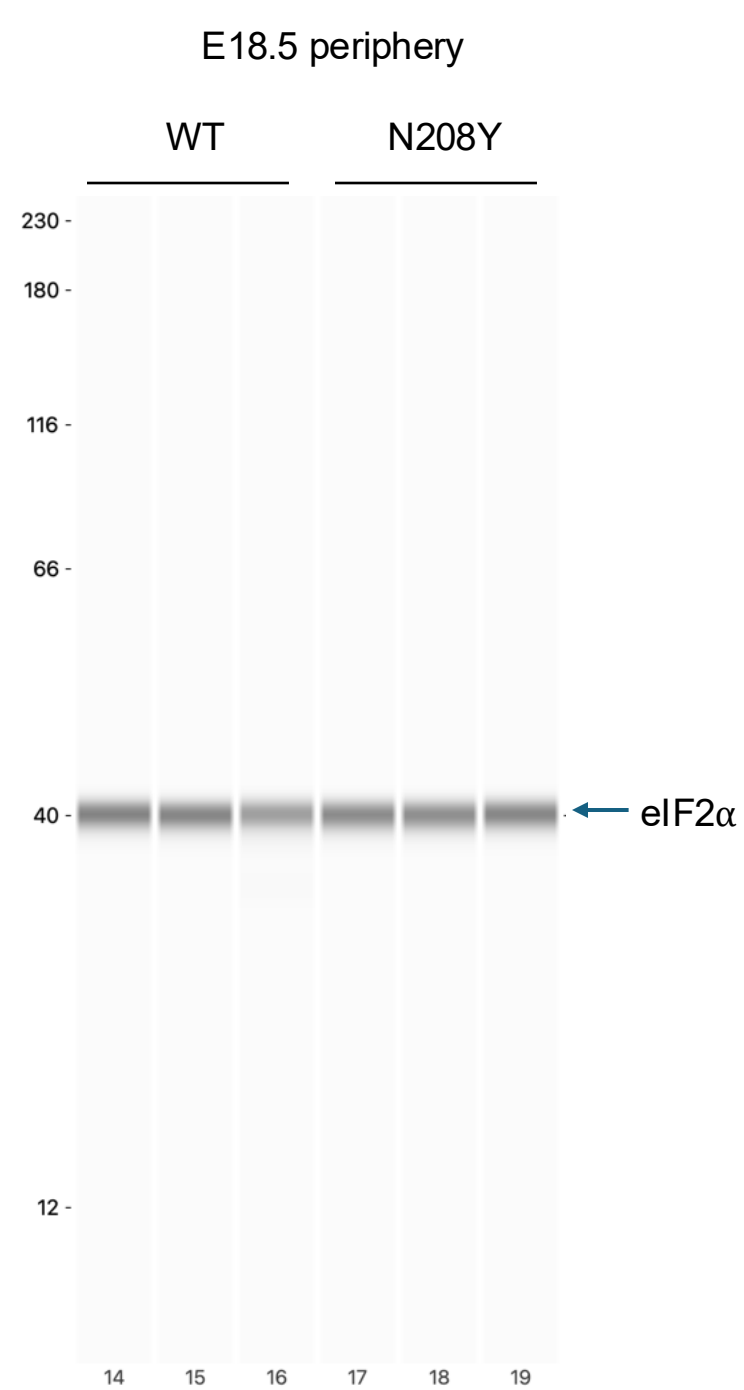

Full unedited  
blot for Figure 2G

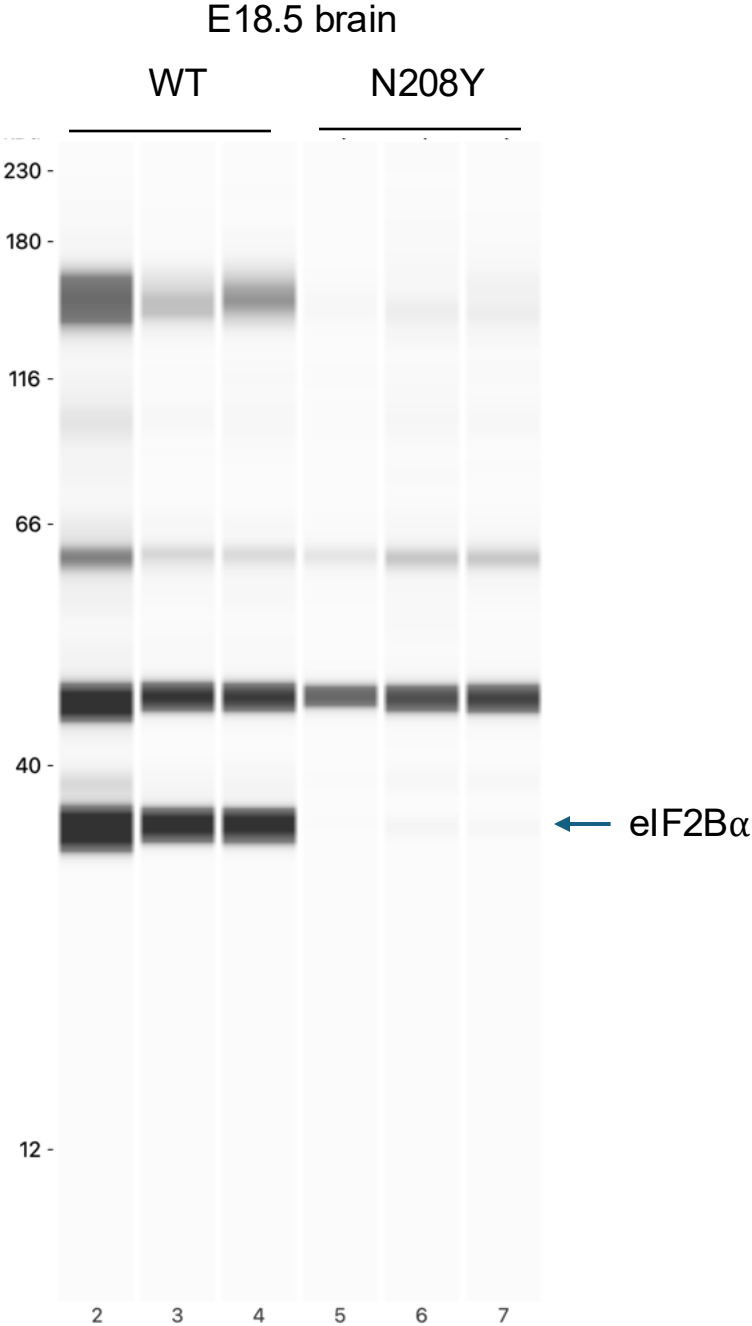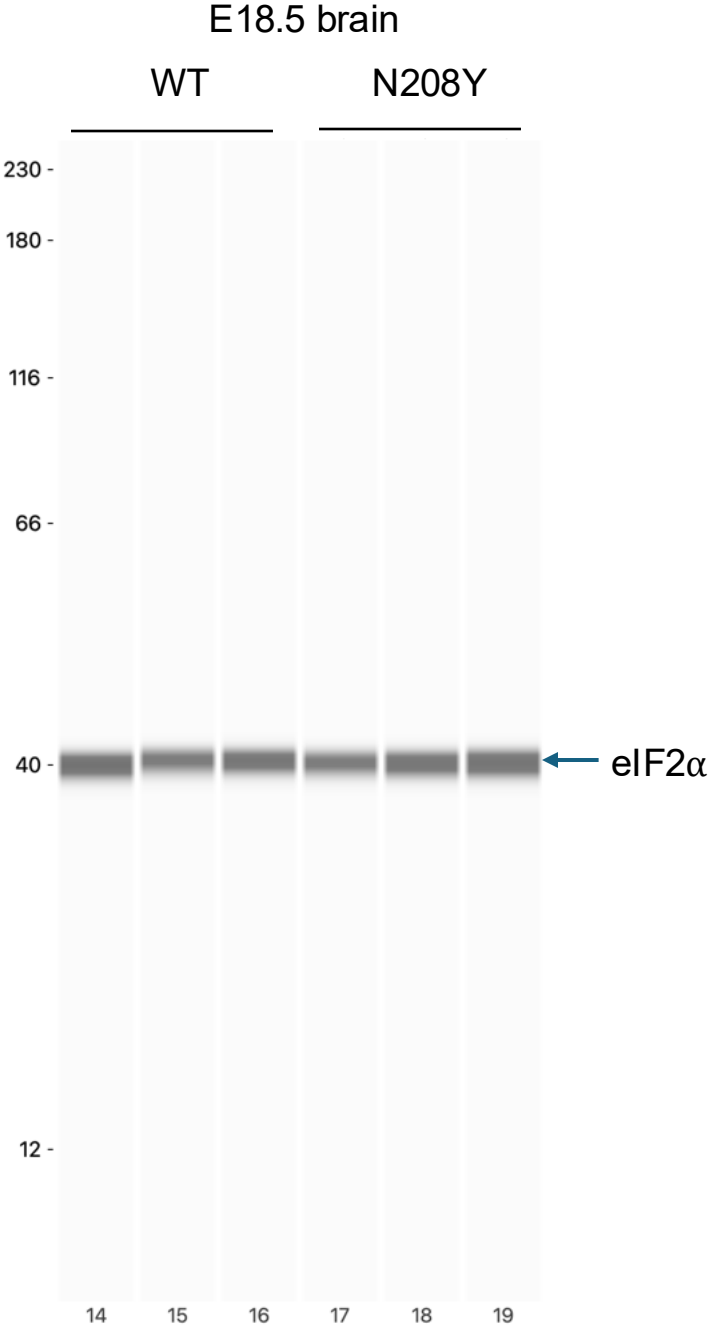

Full  
unedited  
blot for  
Figure 7C

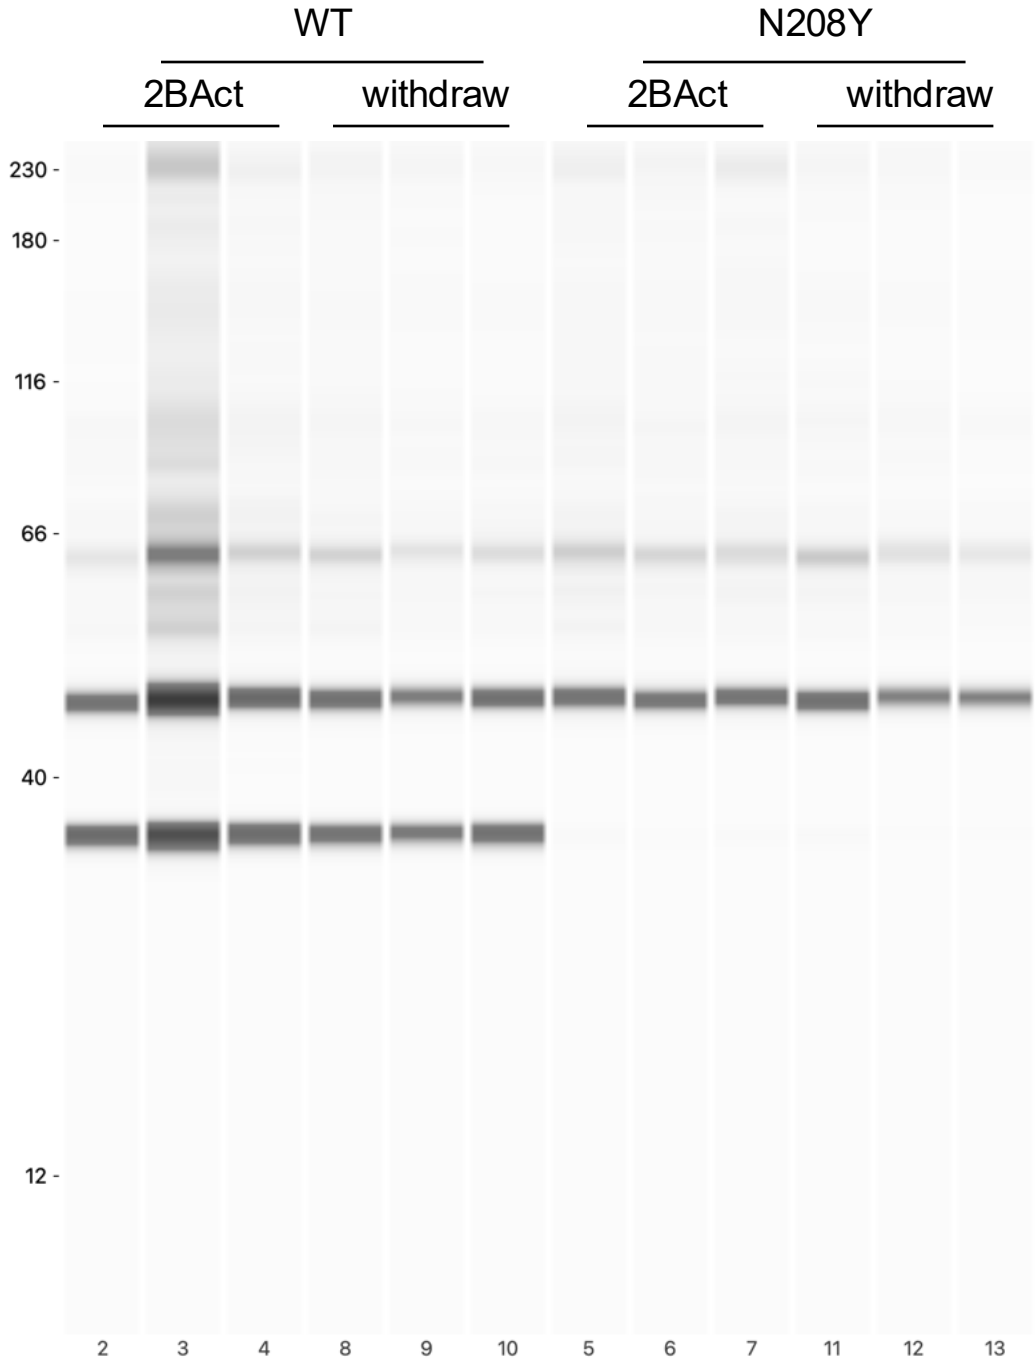

eIF2B $\alpha$

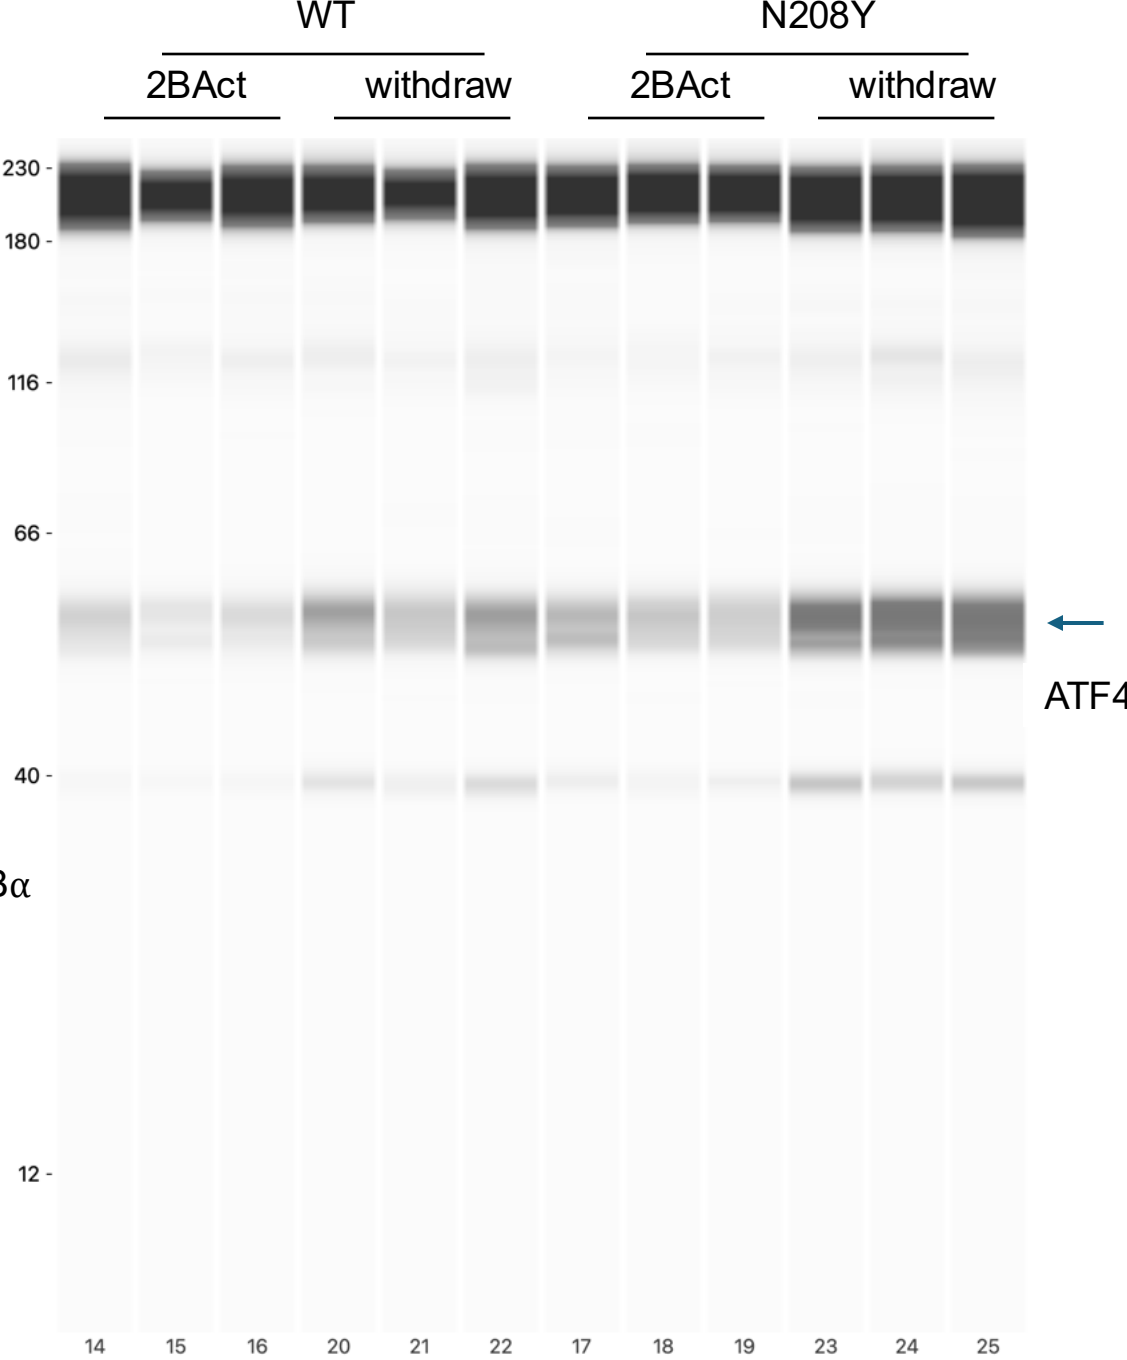

ATF4

Full  
unedited  
blot for  
Figure 7C

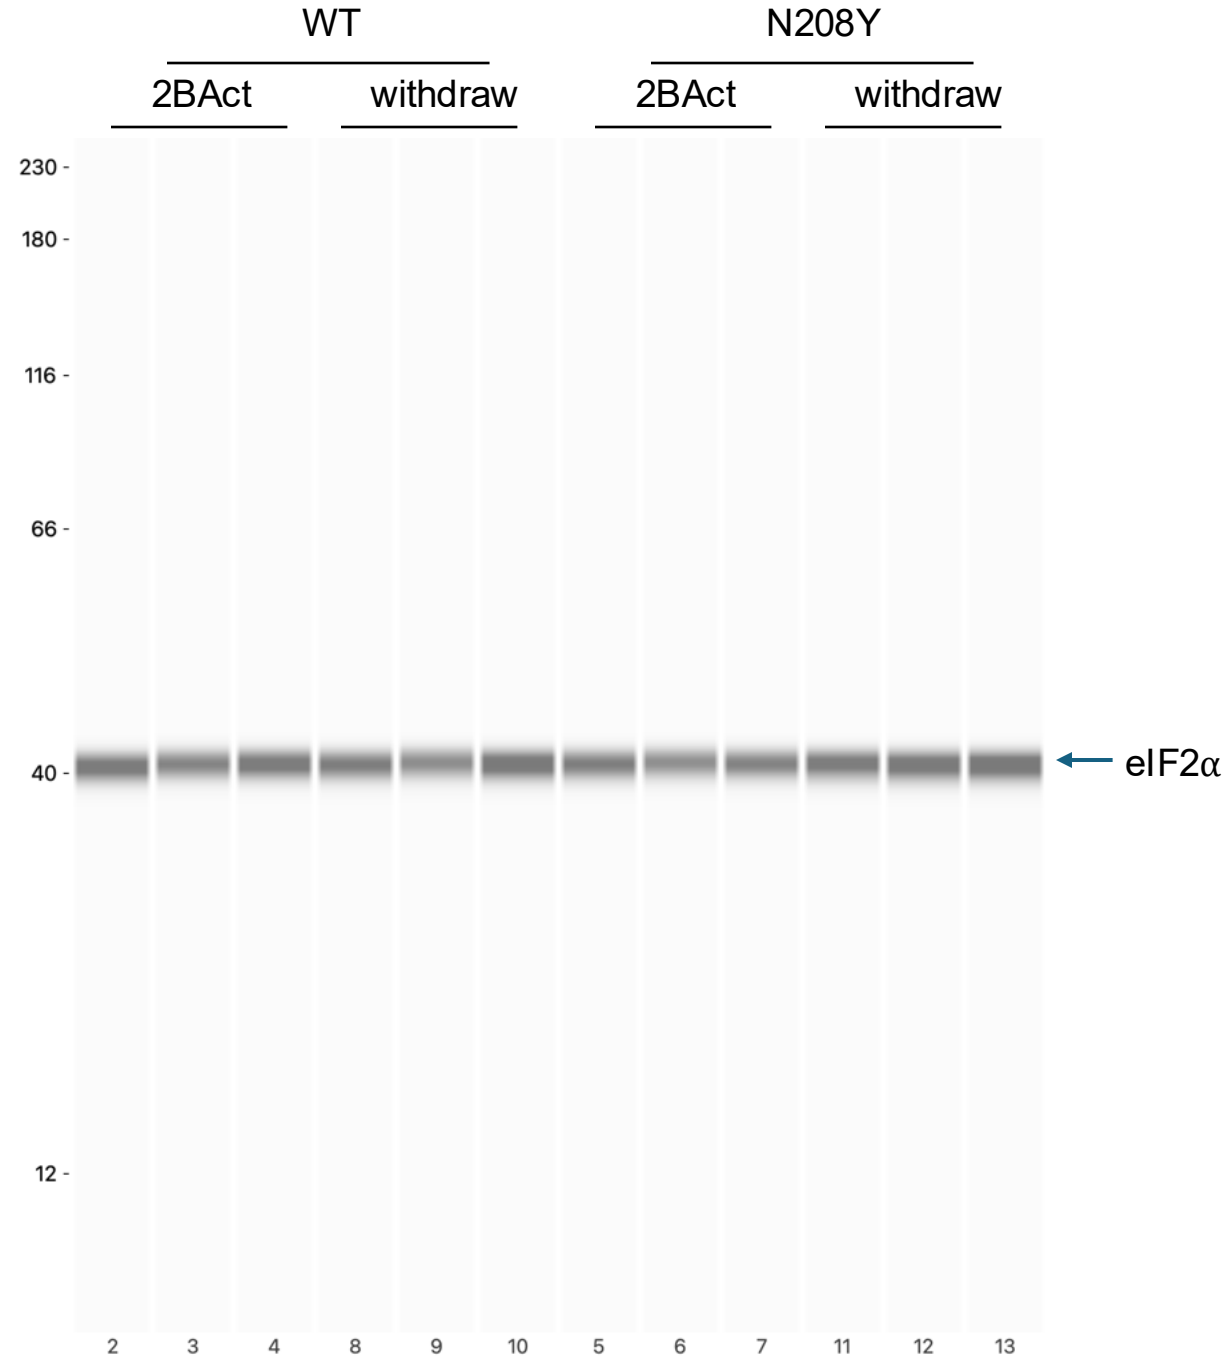



Full unedited  
blot for  
Supplement  
Figure 1B

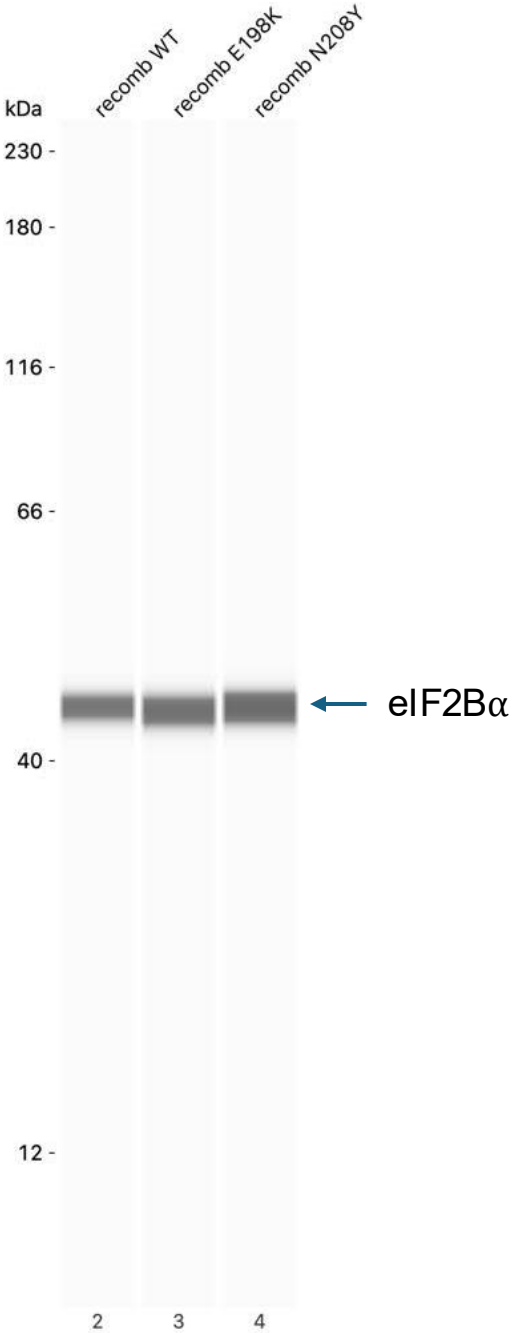

Full unedited  
blot for  
Supplement  
Figure 3B

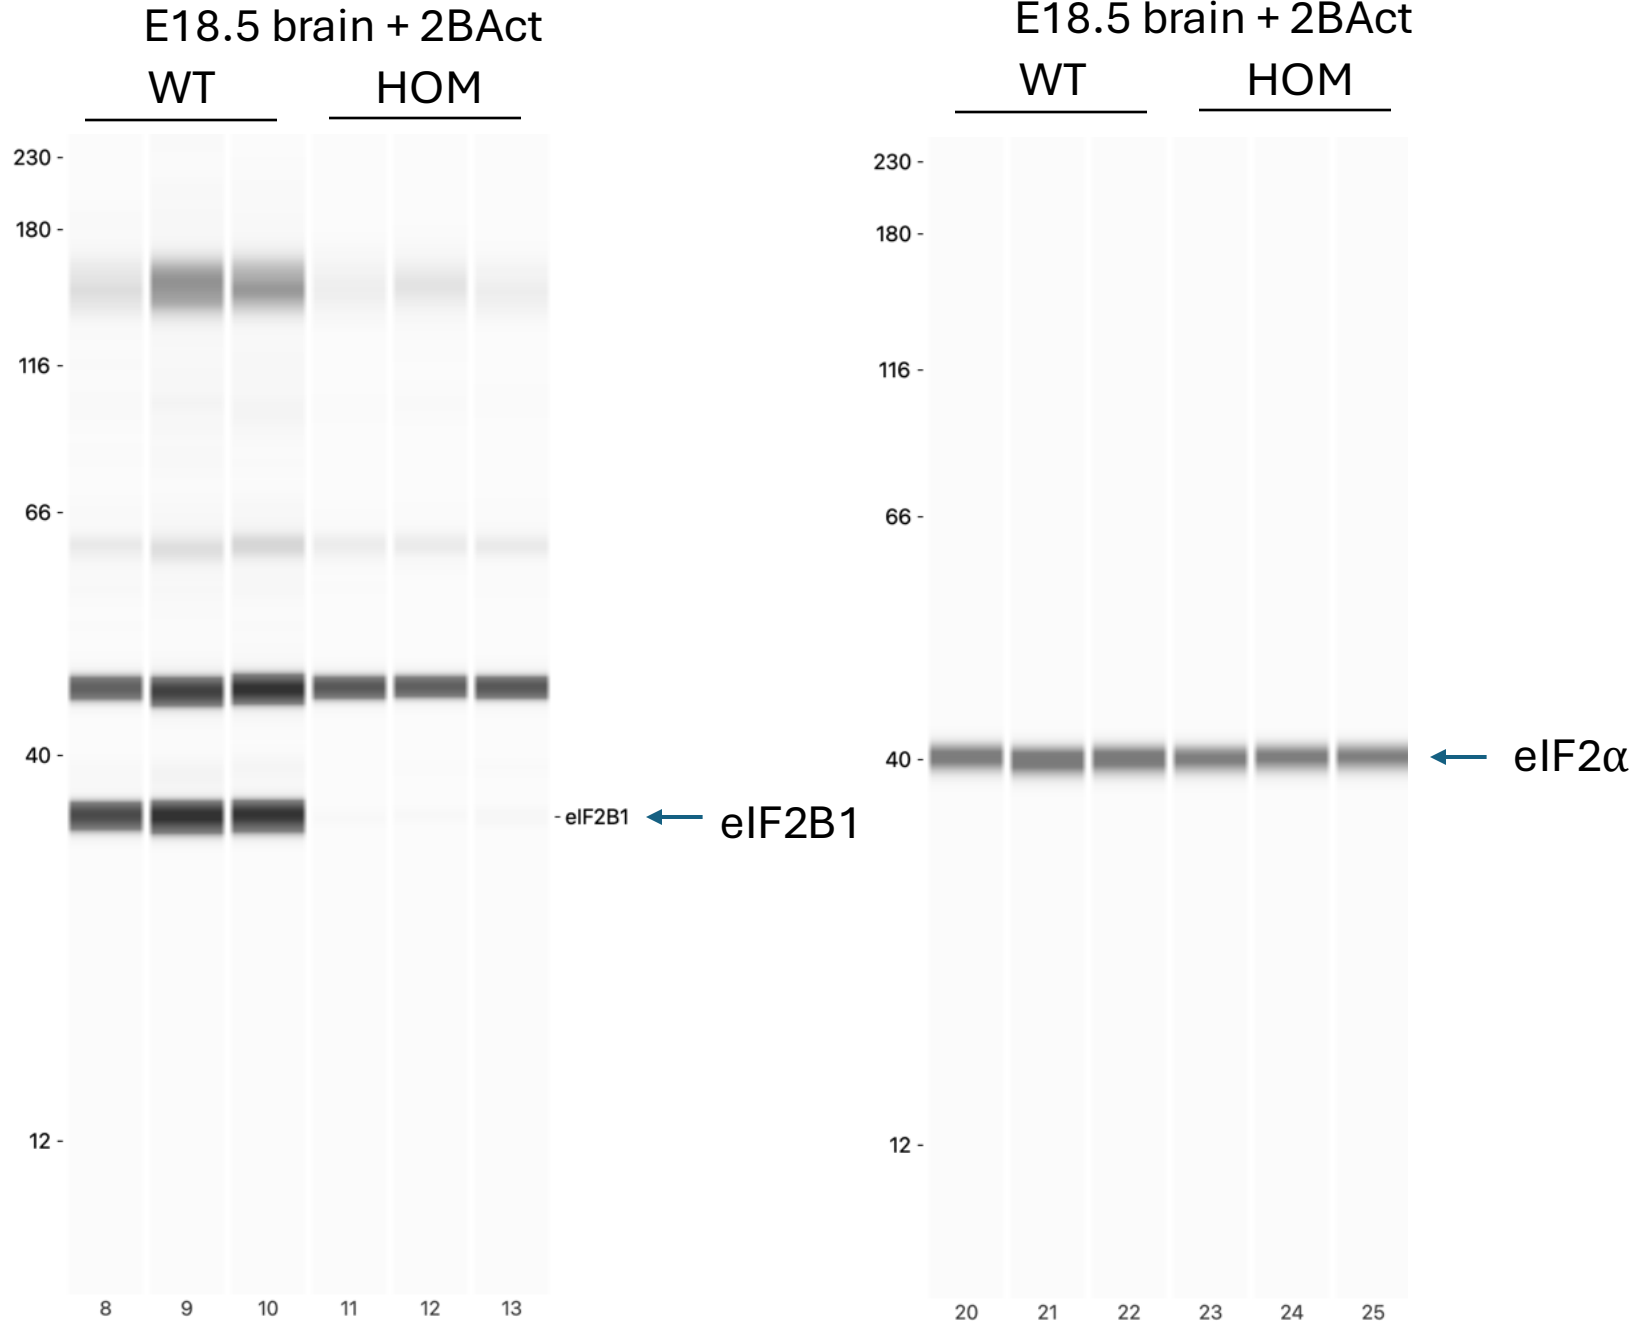

Full unedited  
blot for  
Supplement  
Figure 3C

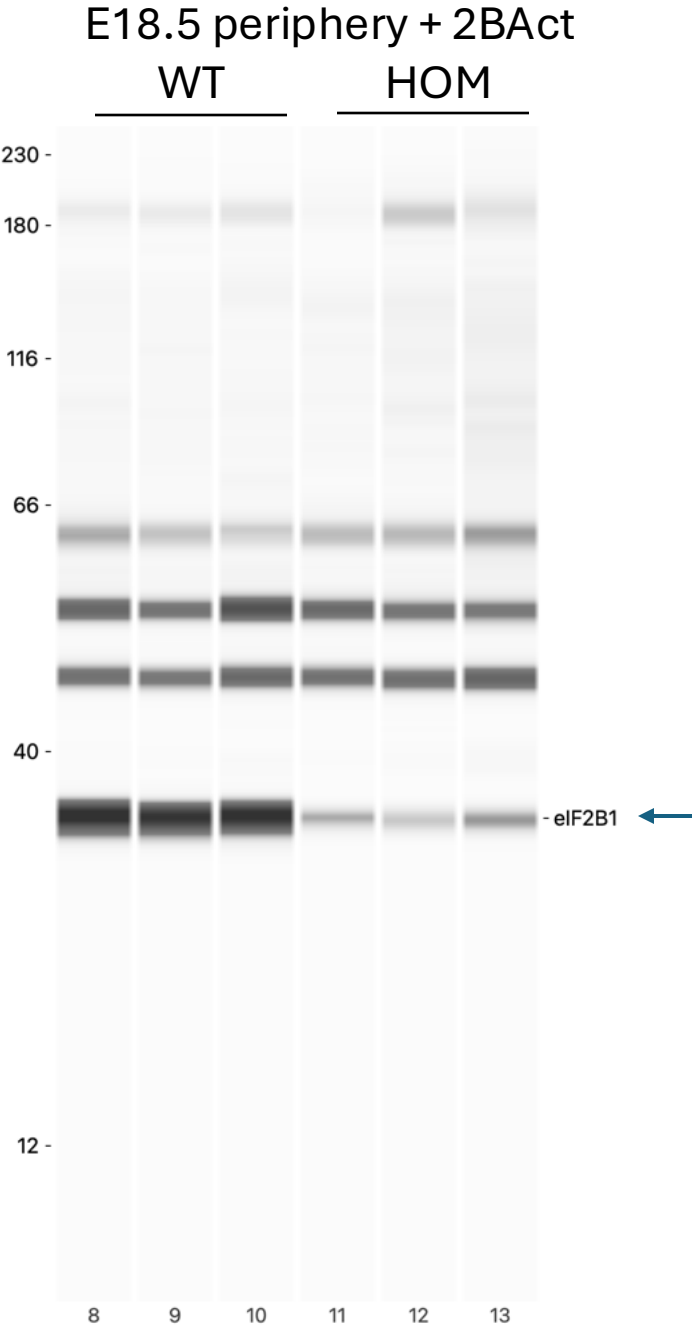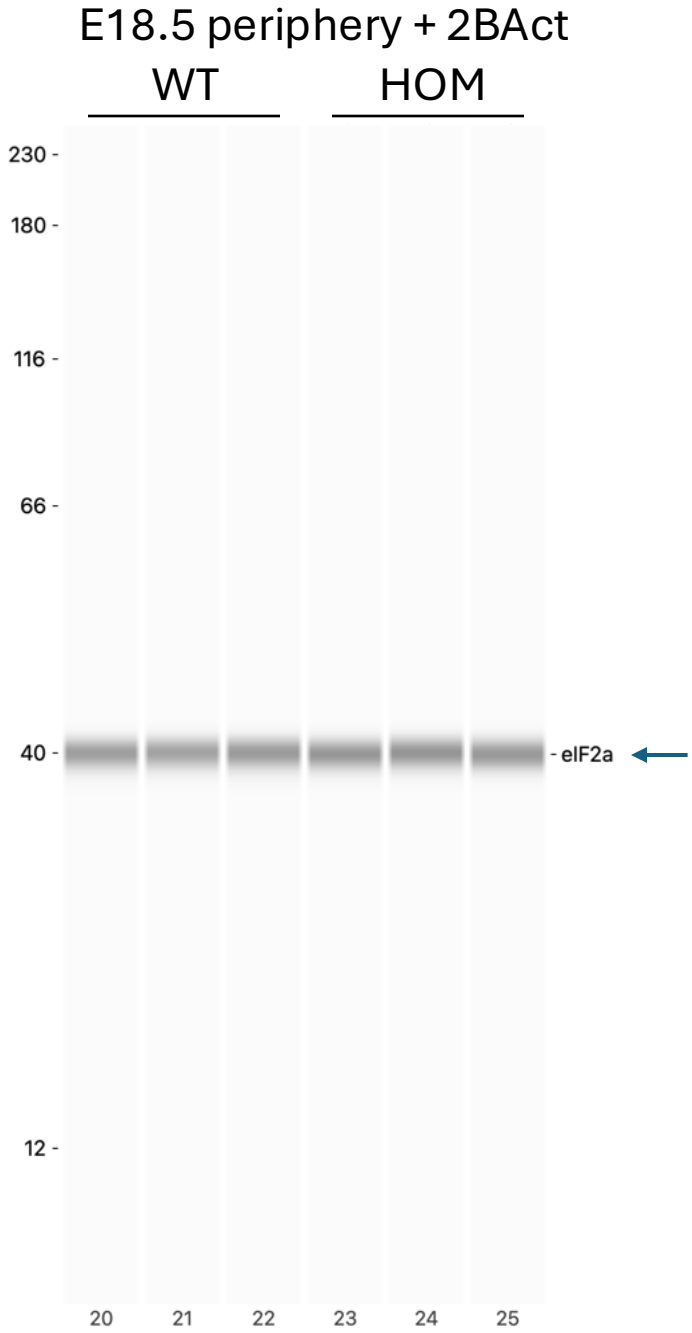

Full unedited blot for  
Supplement Figure 4B

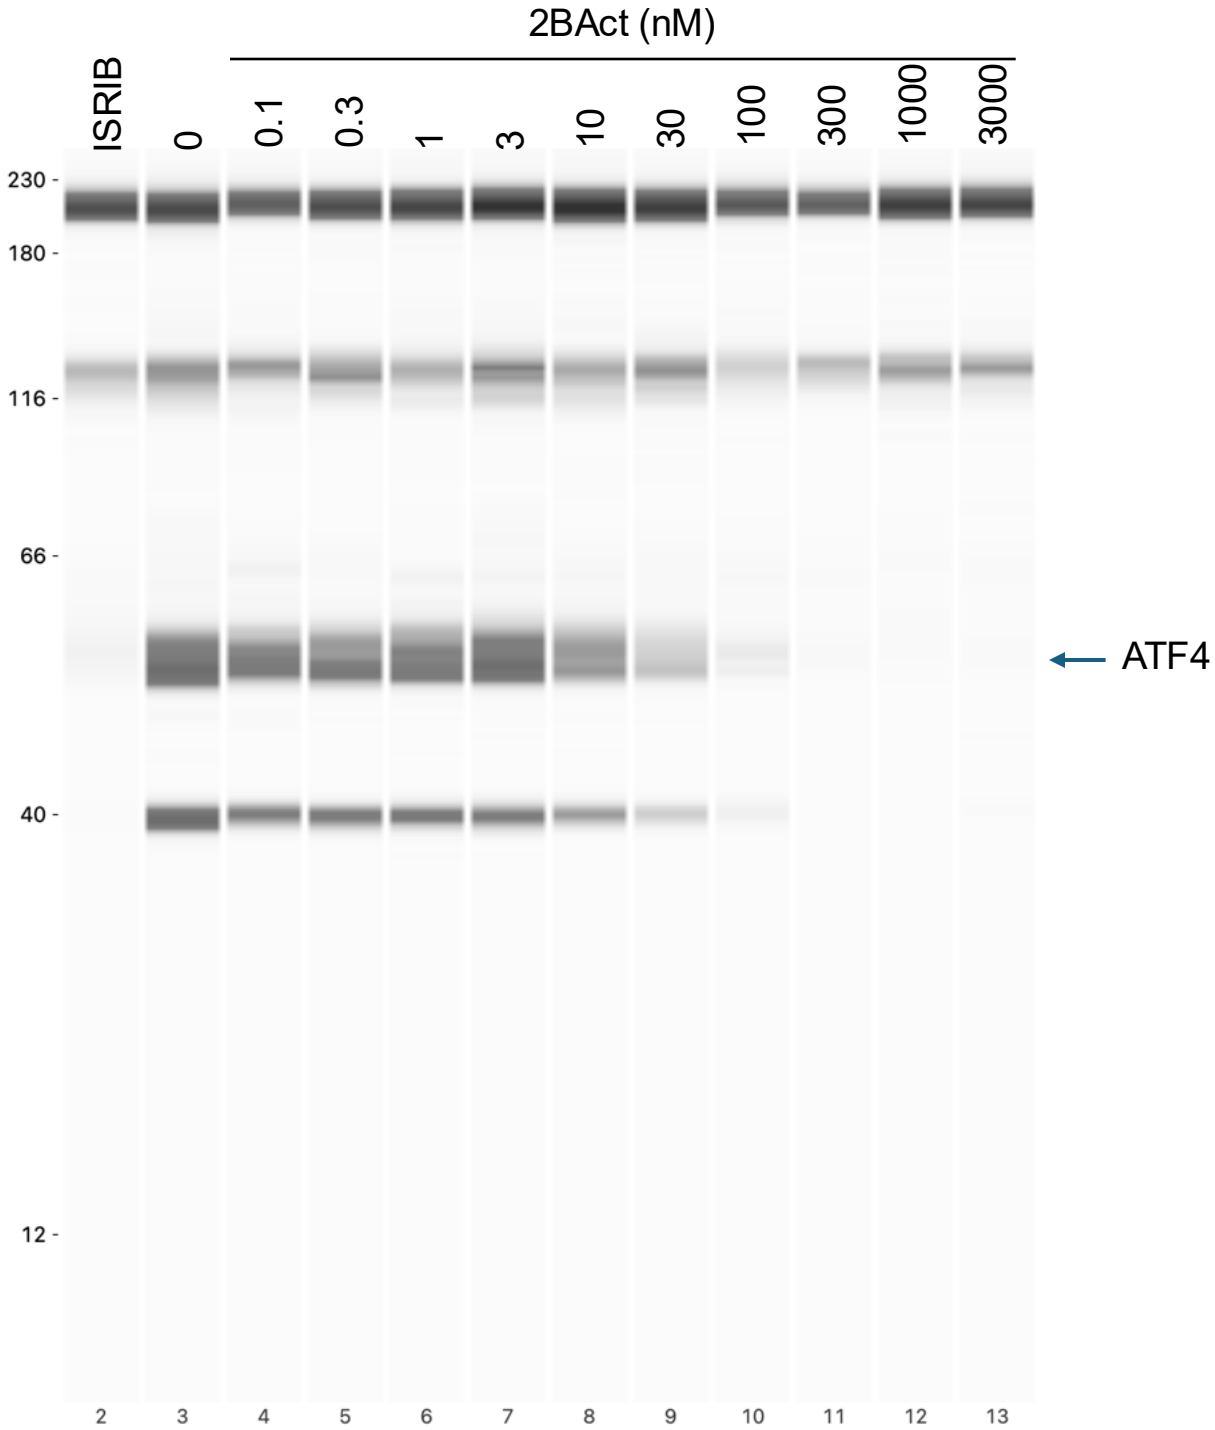

Full unedited blot for  
Supplement Figure 4B

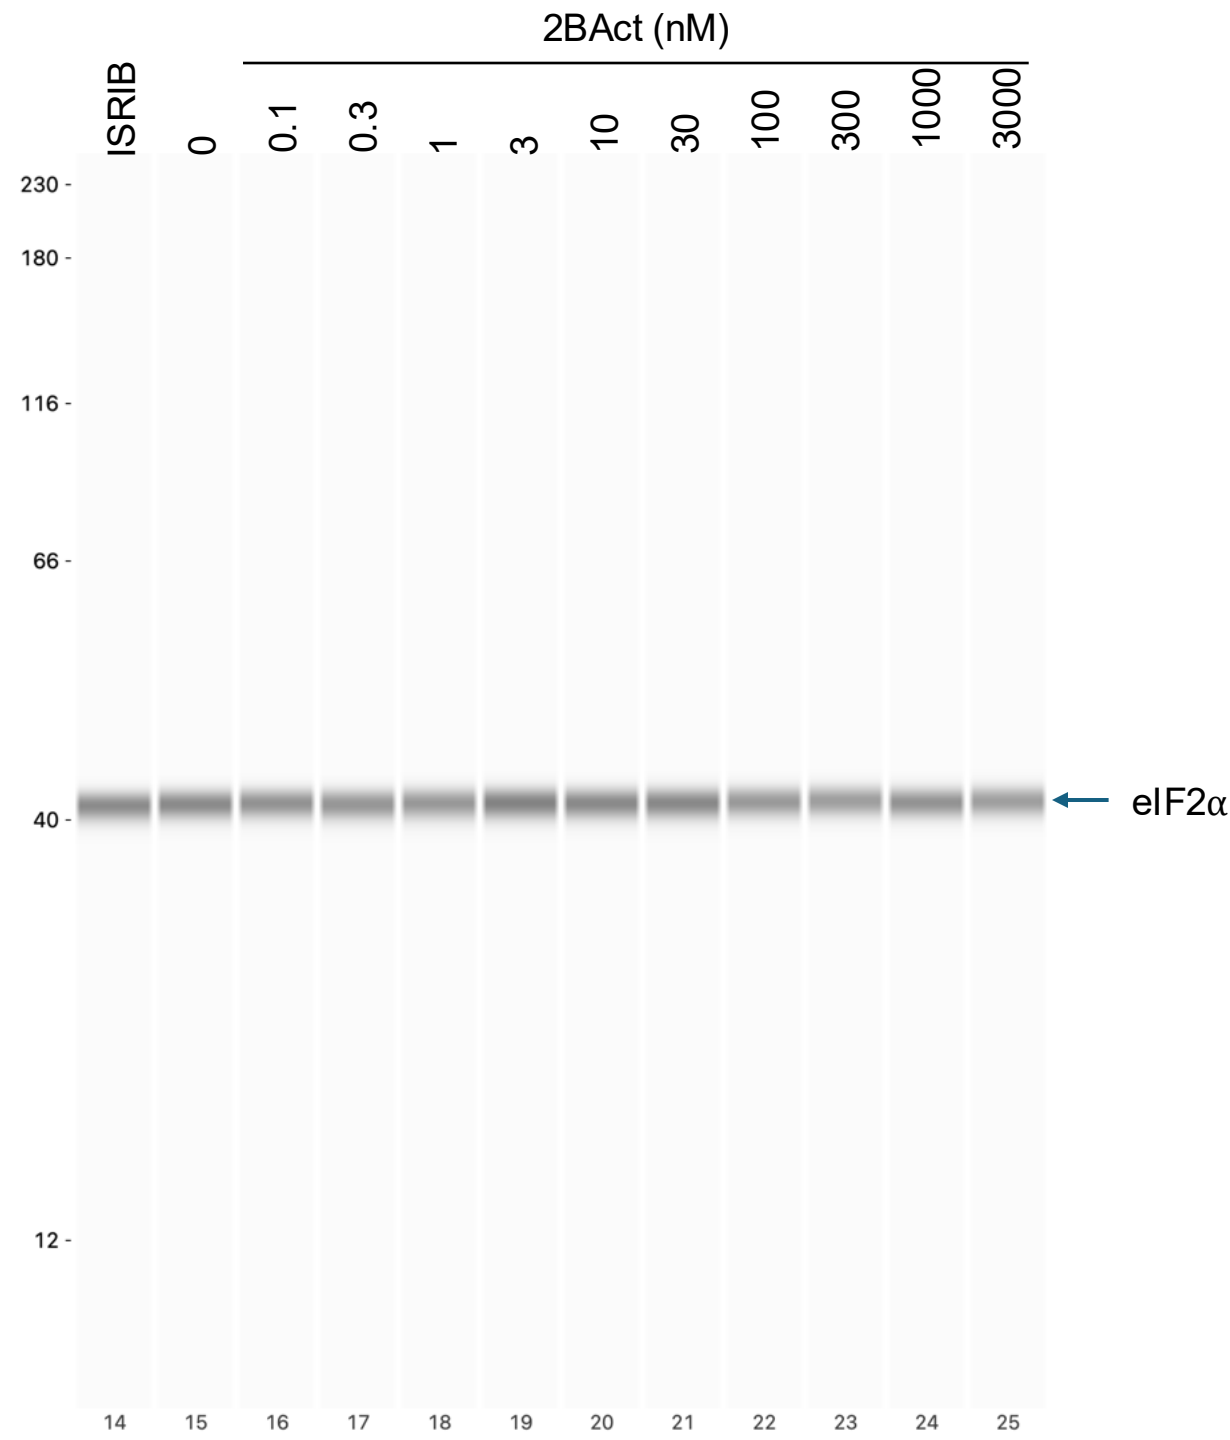

WT+2BAct

N208Y+2BAct

WT+2BAct

N208Y+2BAct

Full unedited blot for  
Supplement Figure 4D

Brain

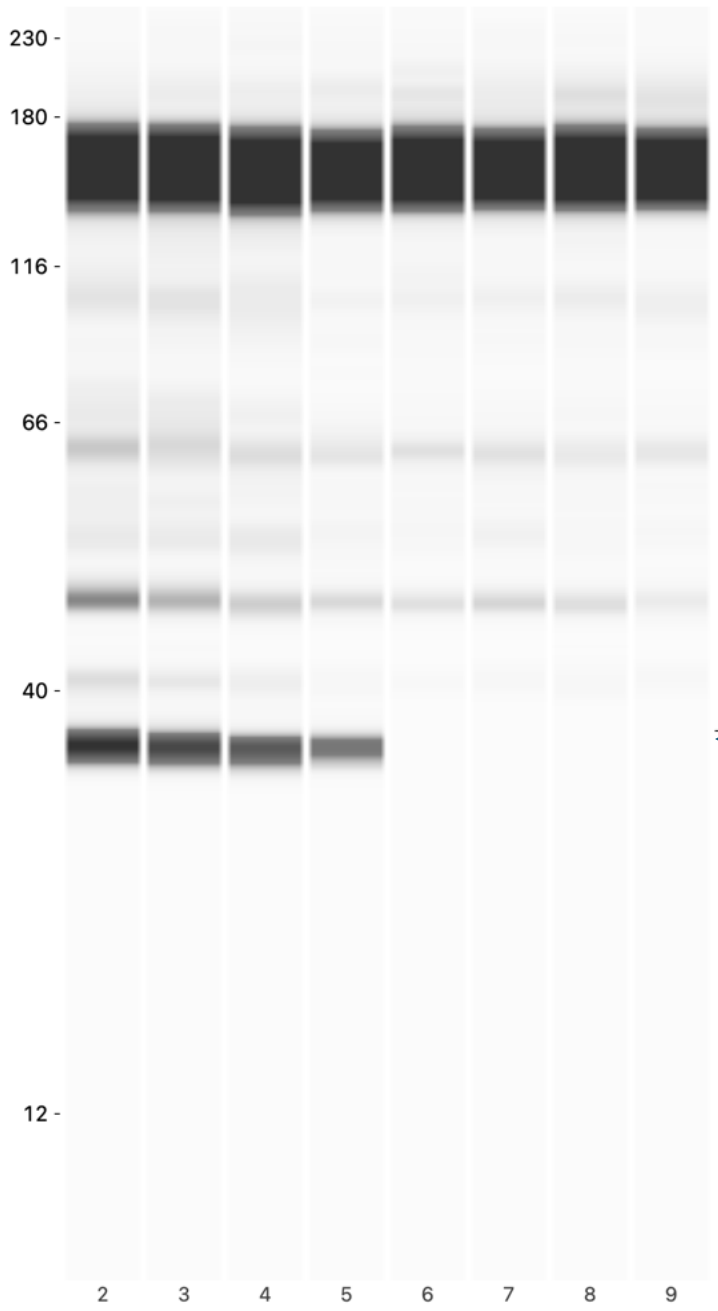

← eIF2B $\alpha$

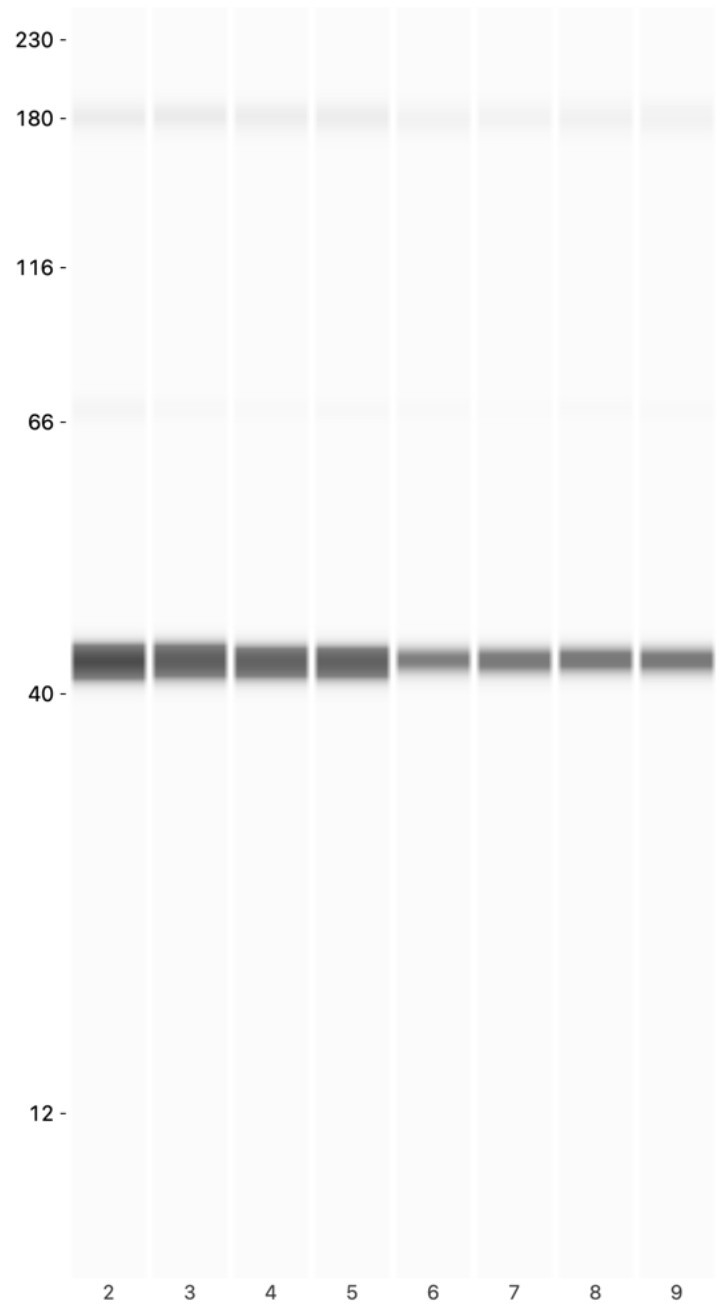

← eIF2B $\beta$

Full unedited blot for  
Supplement Figure 4D

Brain

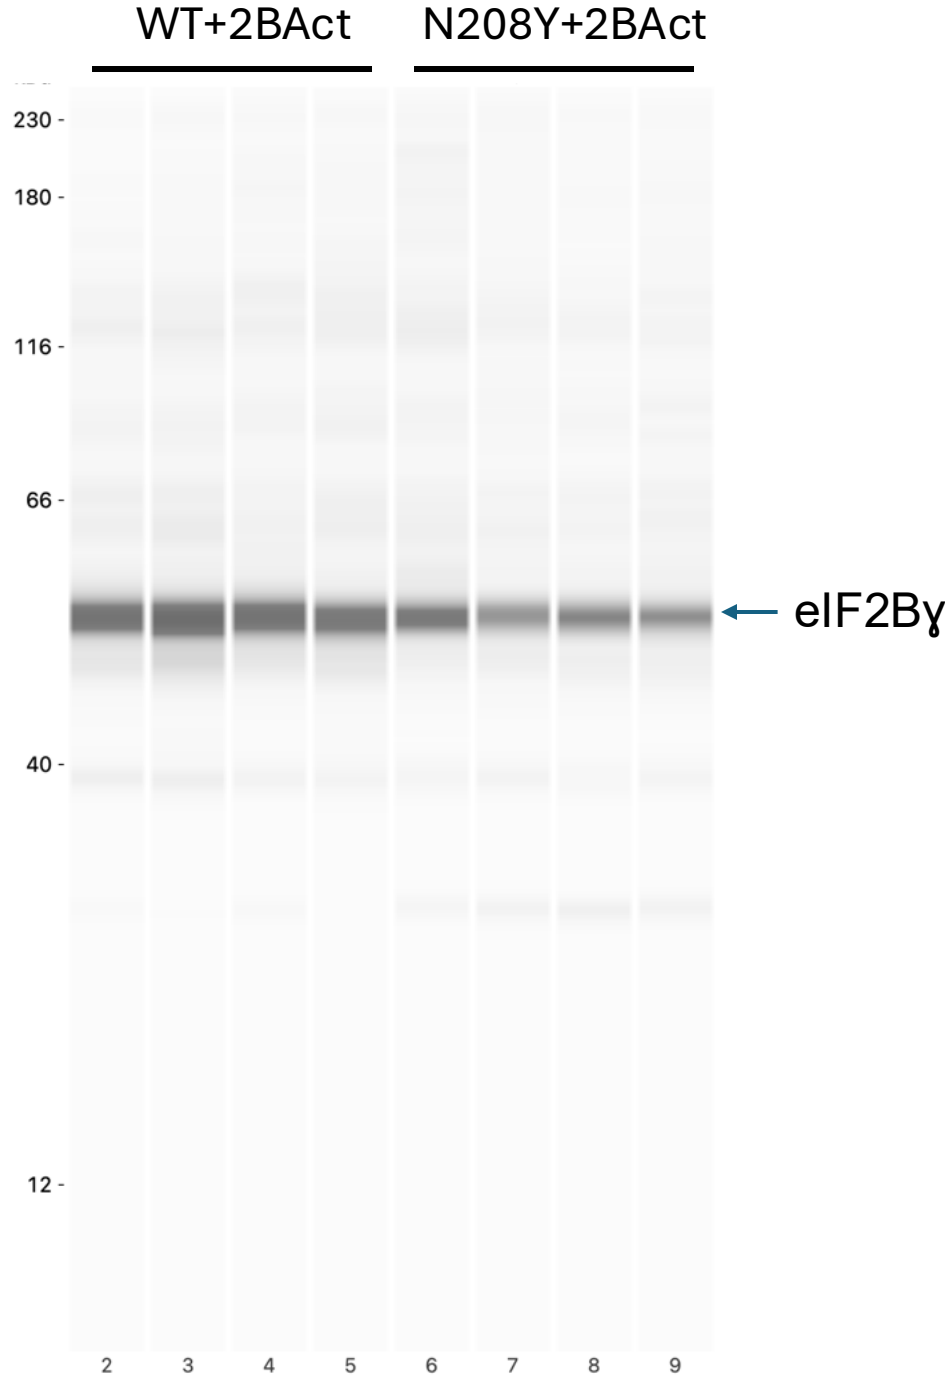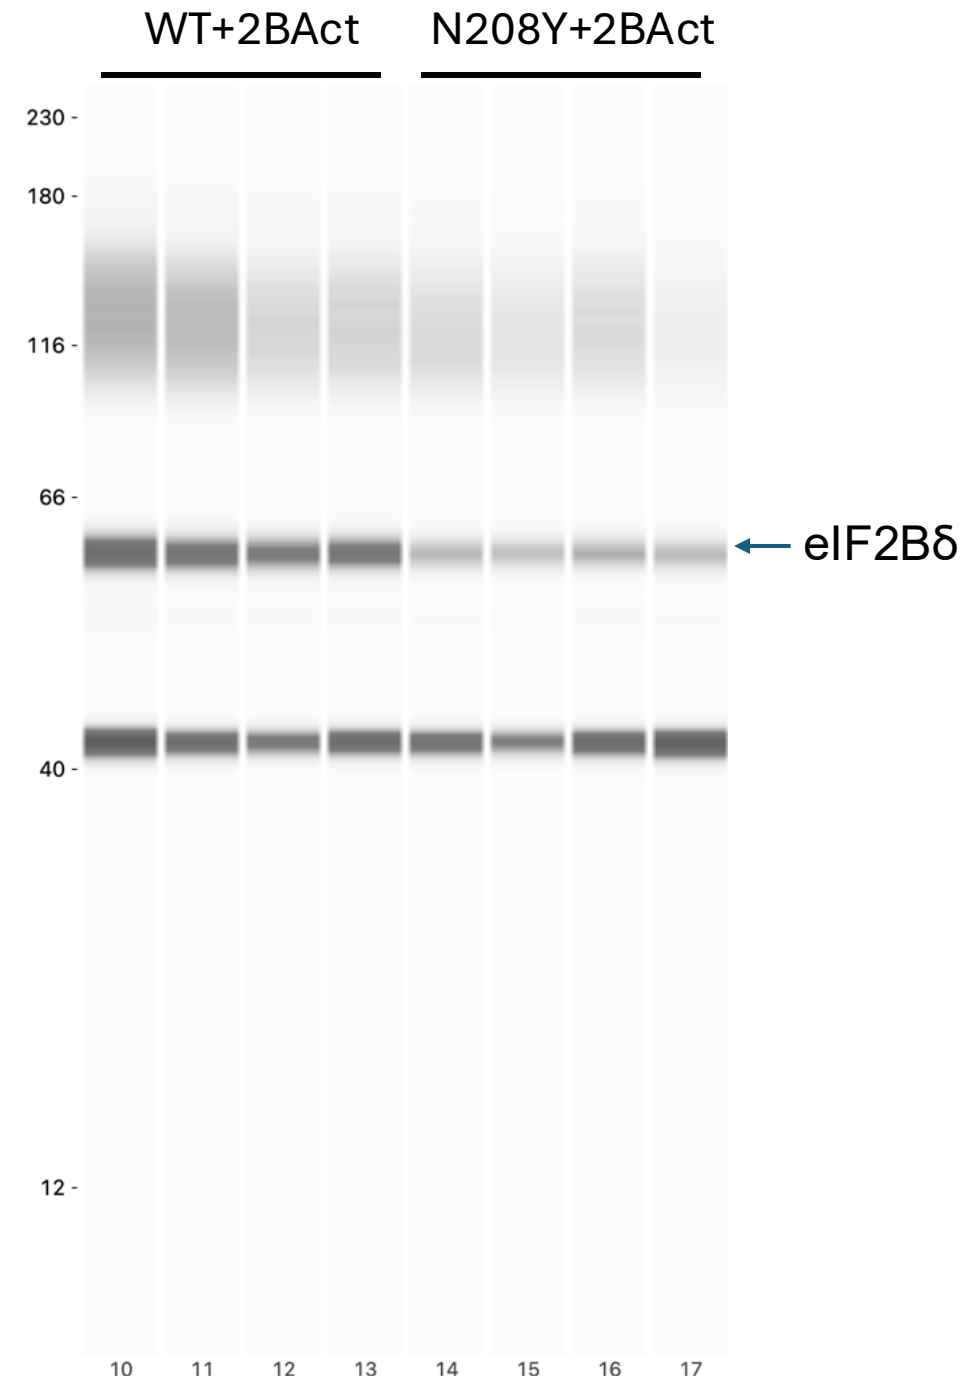

Full unedited blot for  
Supplement Figure 4D

Brain

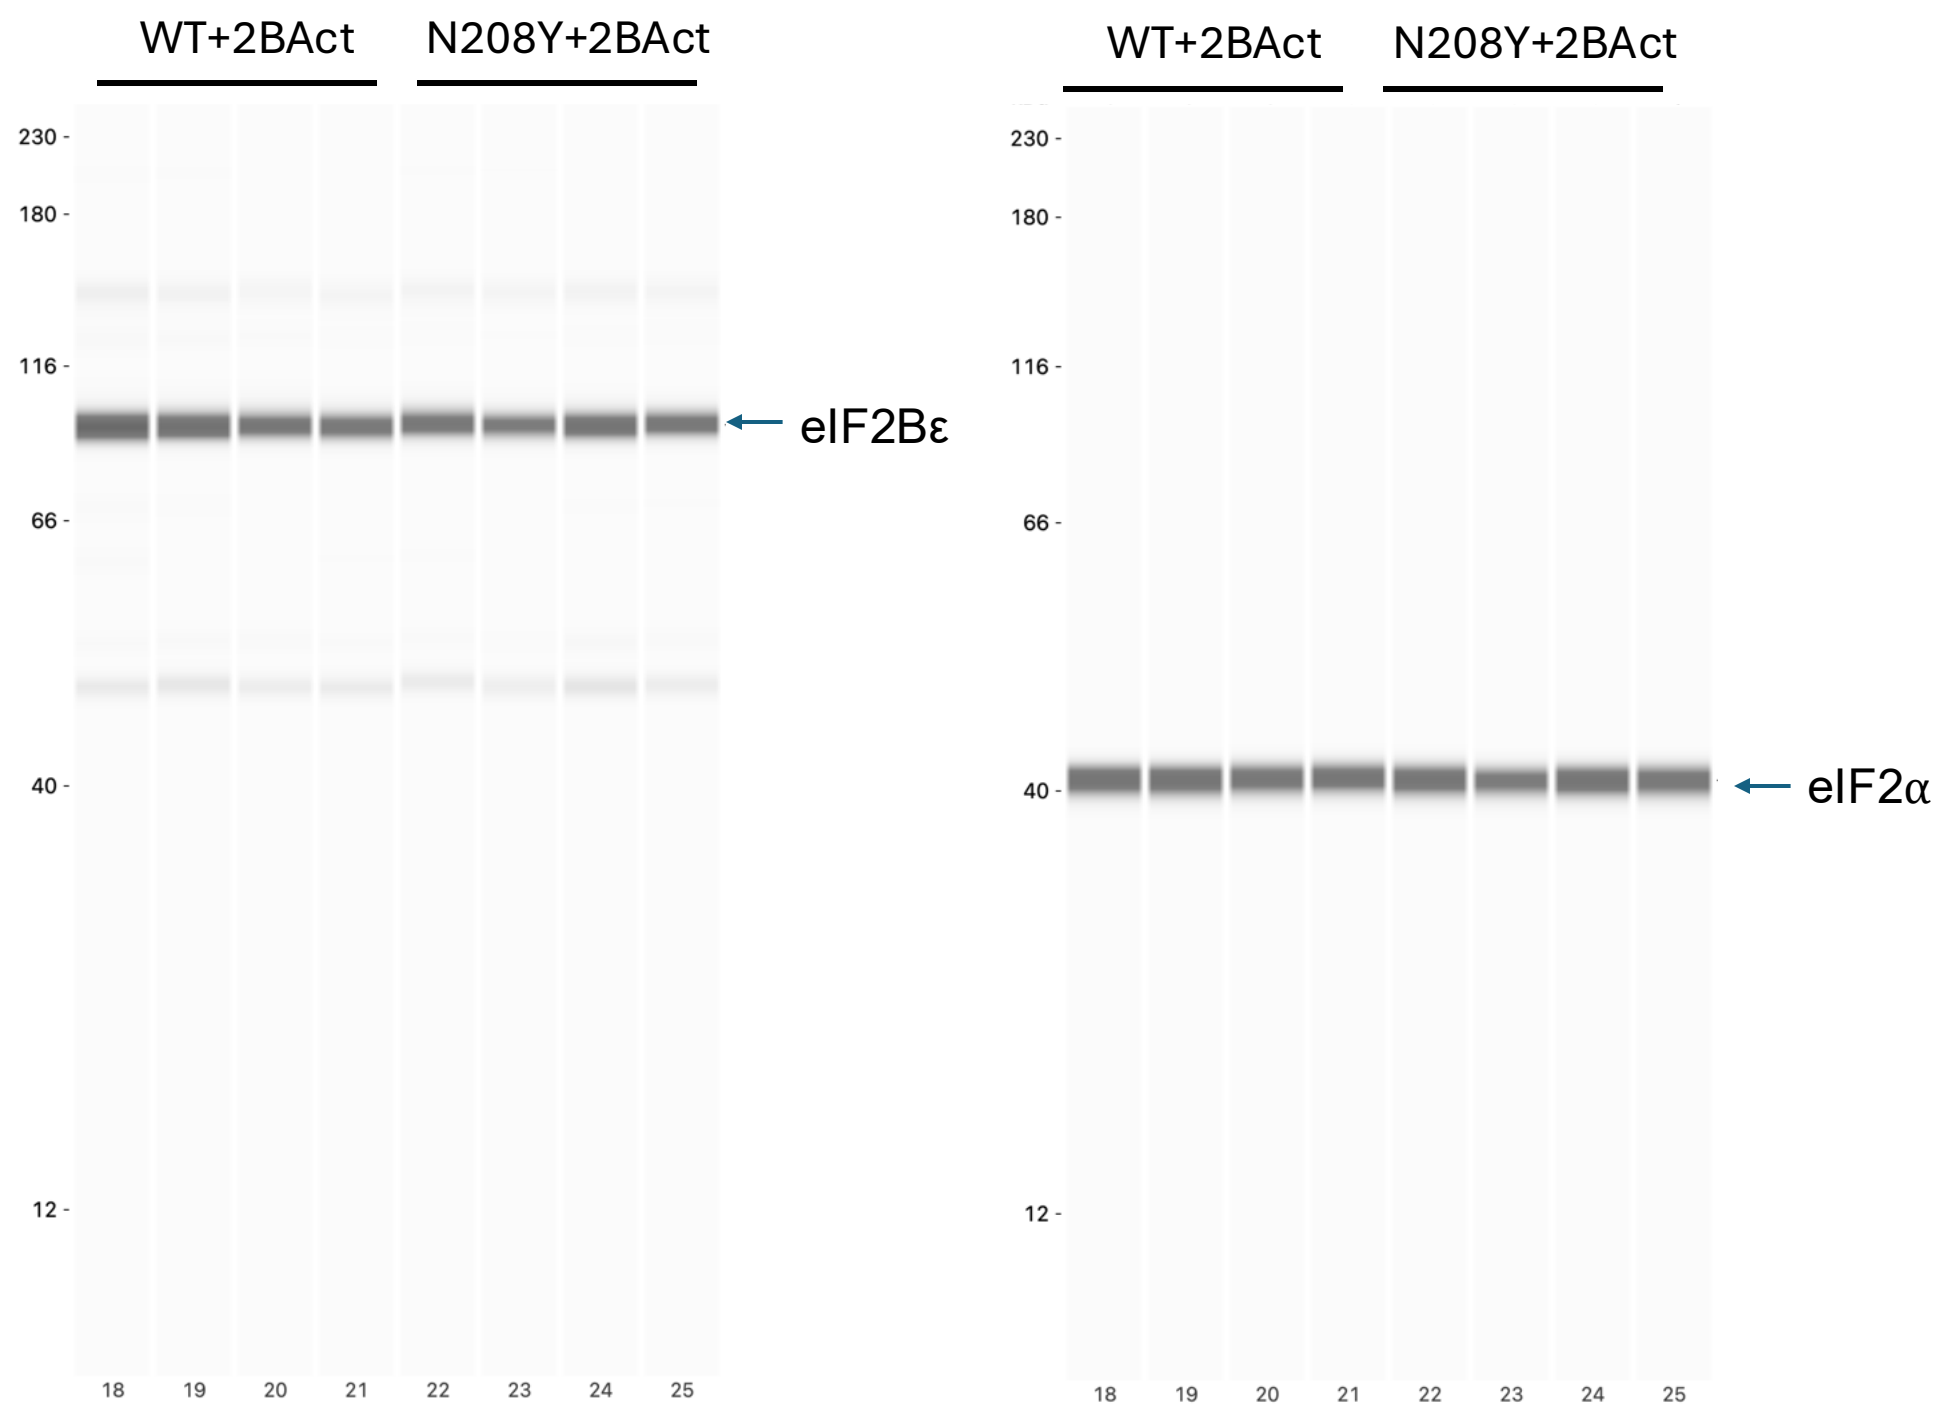



Full unedited blot for  
Supplement Figure 4D

Liver

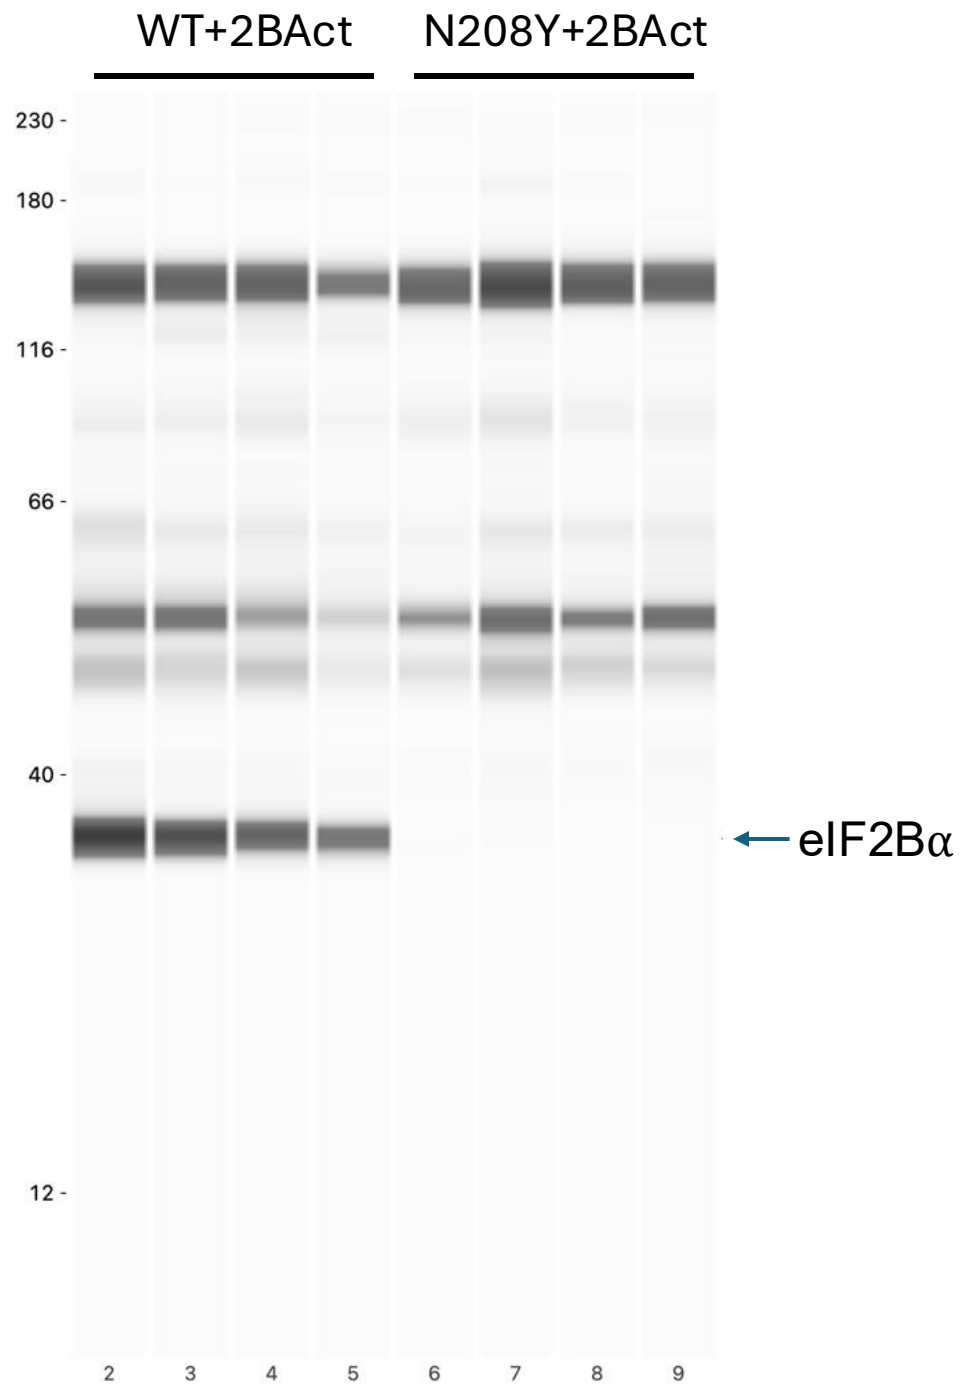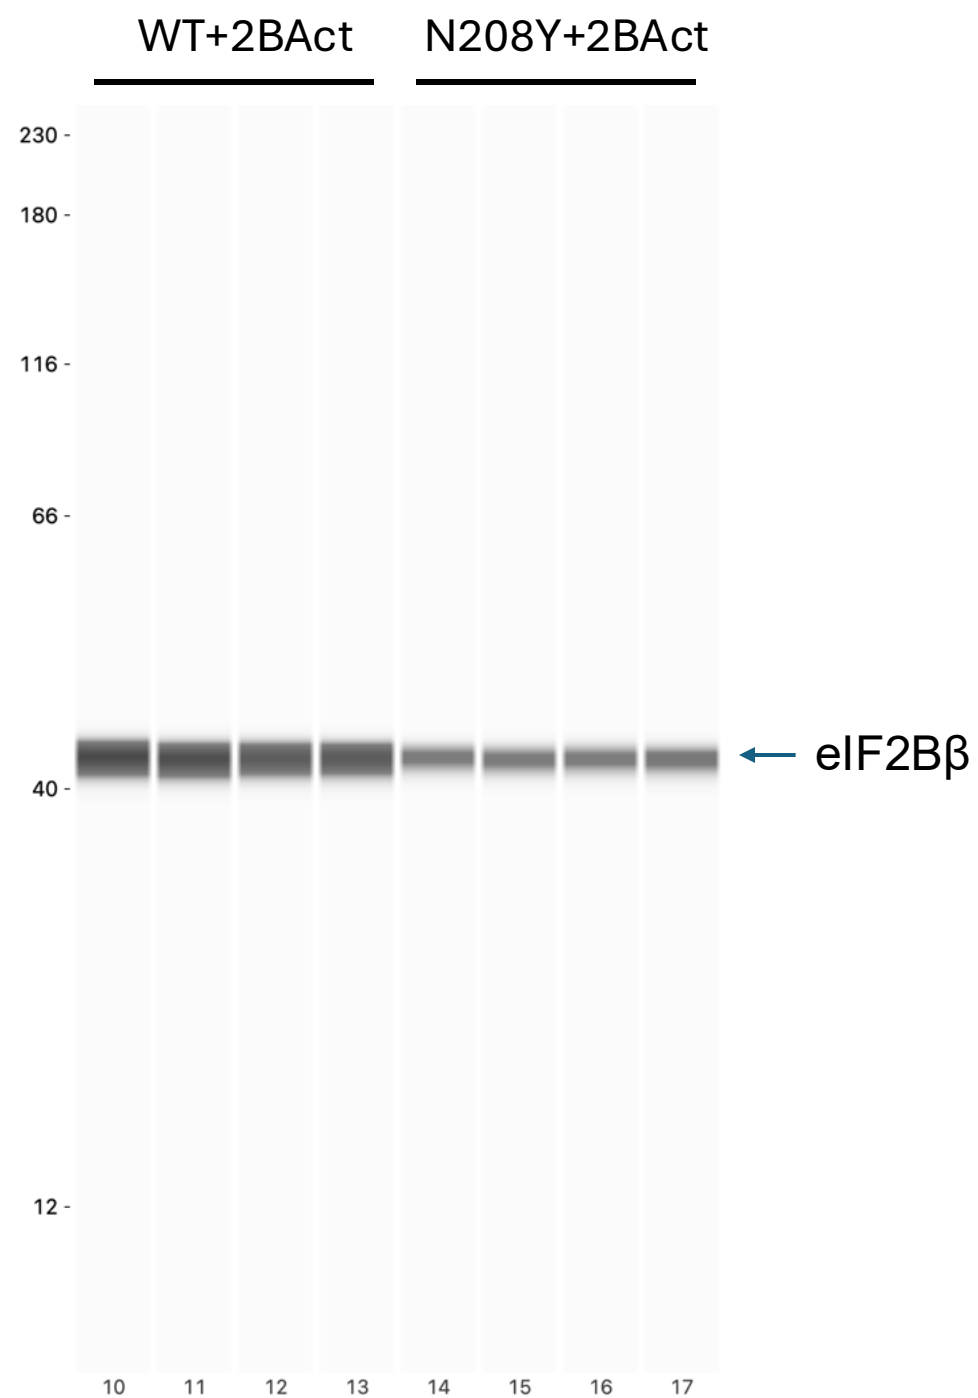

Full unedited blot for  
Supplement Figure 4D

Liver

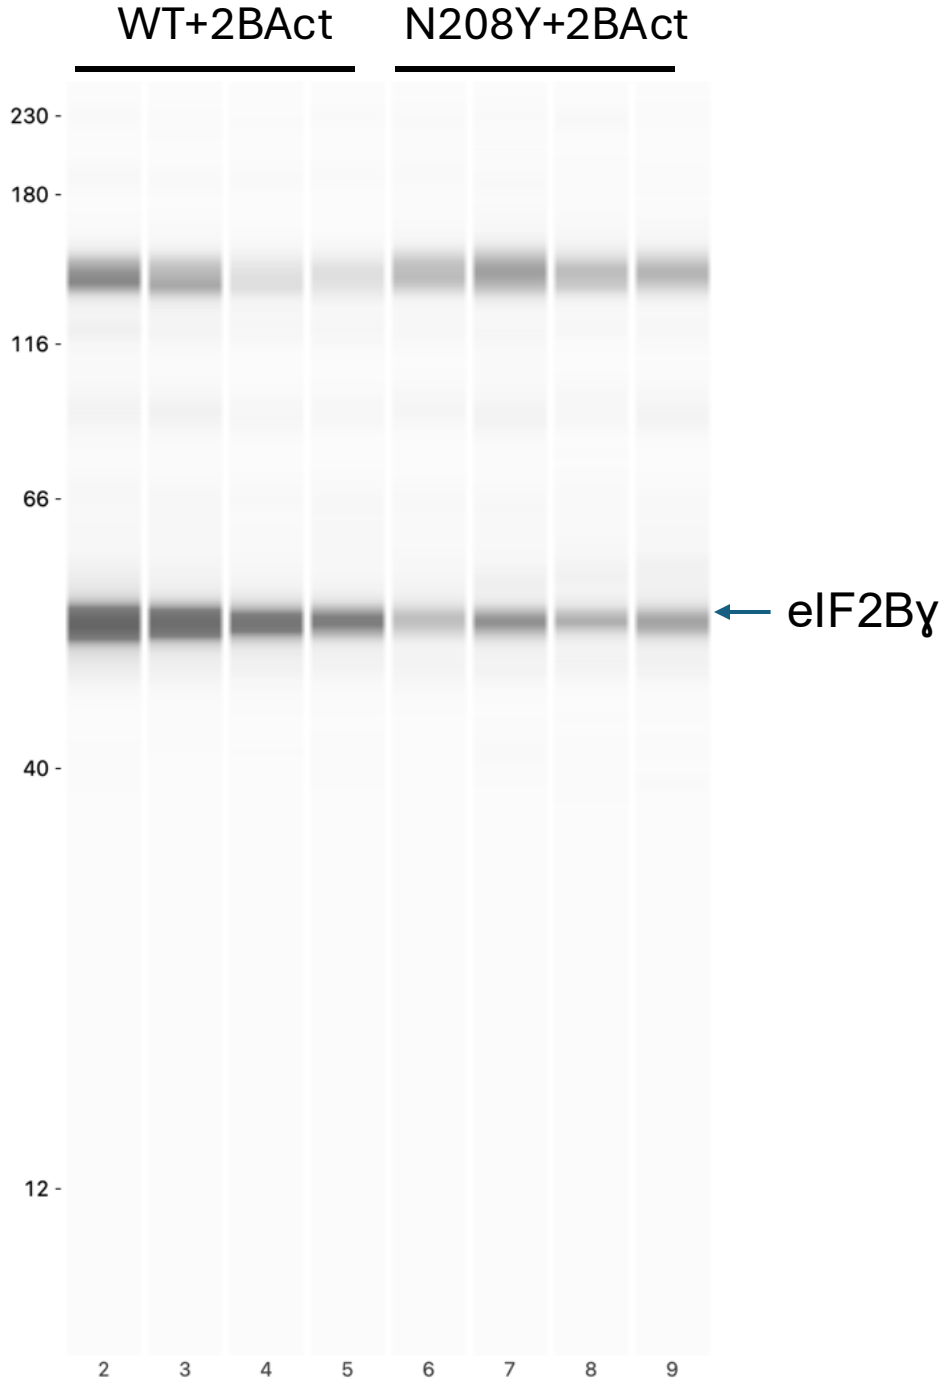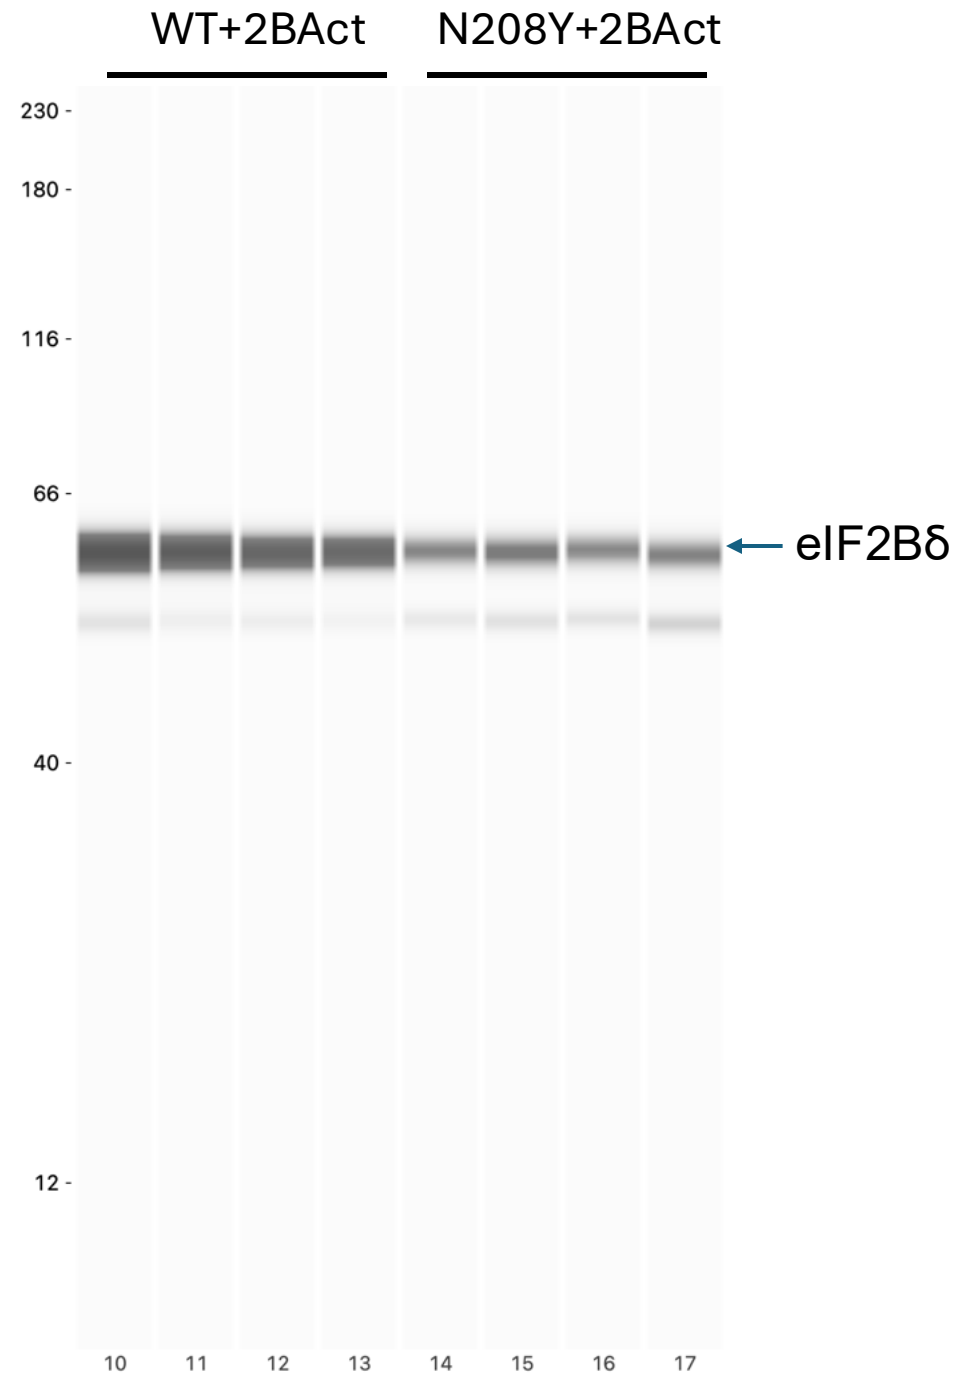

WT+2BAct      N208Y+2BAct

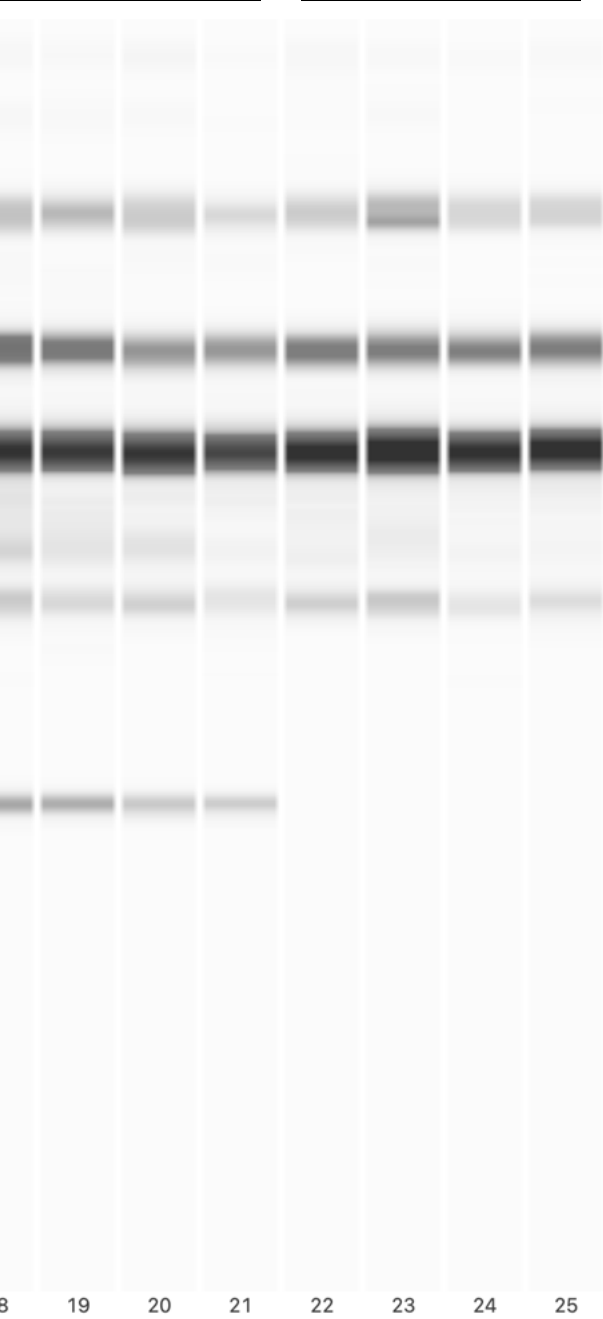

WT+2BAct      N208Y+2BAct

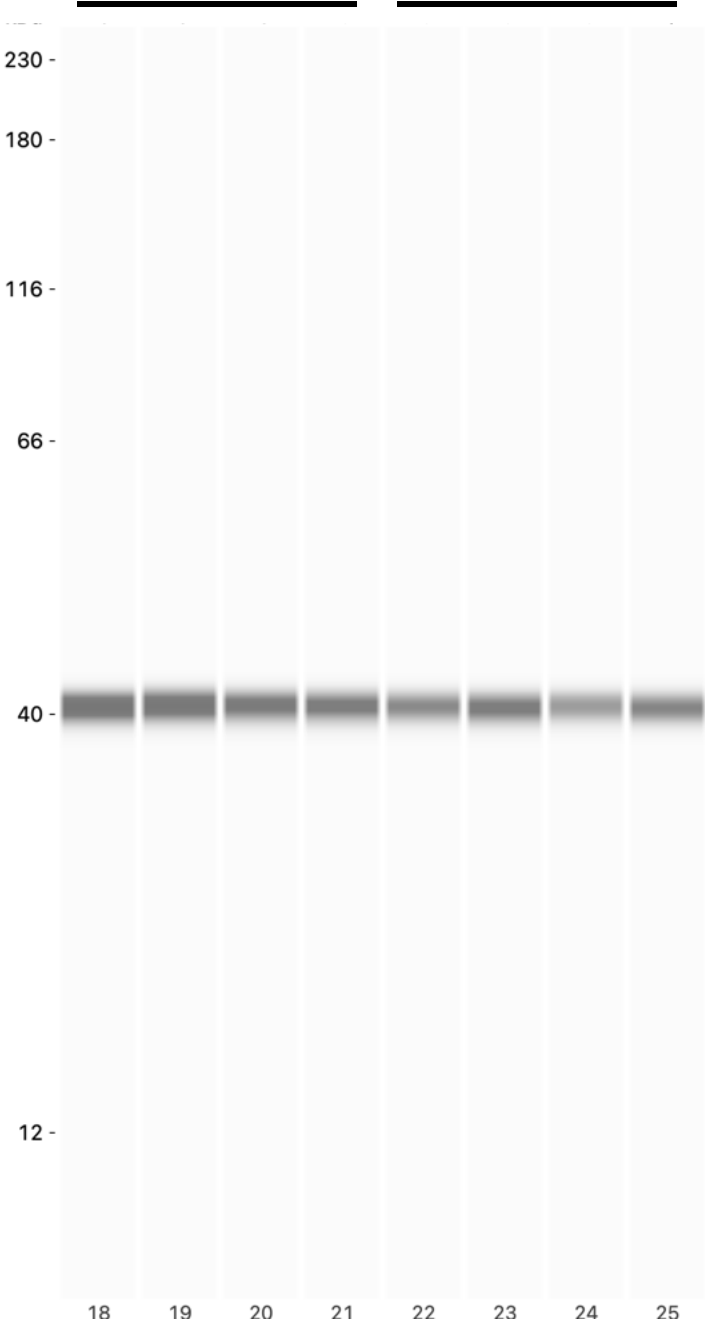

Full unedited blot for  
Supplement Figure 4D

Liver

← eIF2Bε

← eIF2α

Full unedited blot for  
Supplement Figure 4D

Kidney

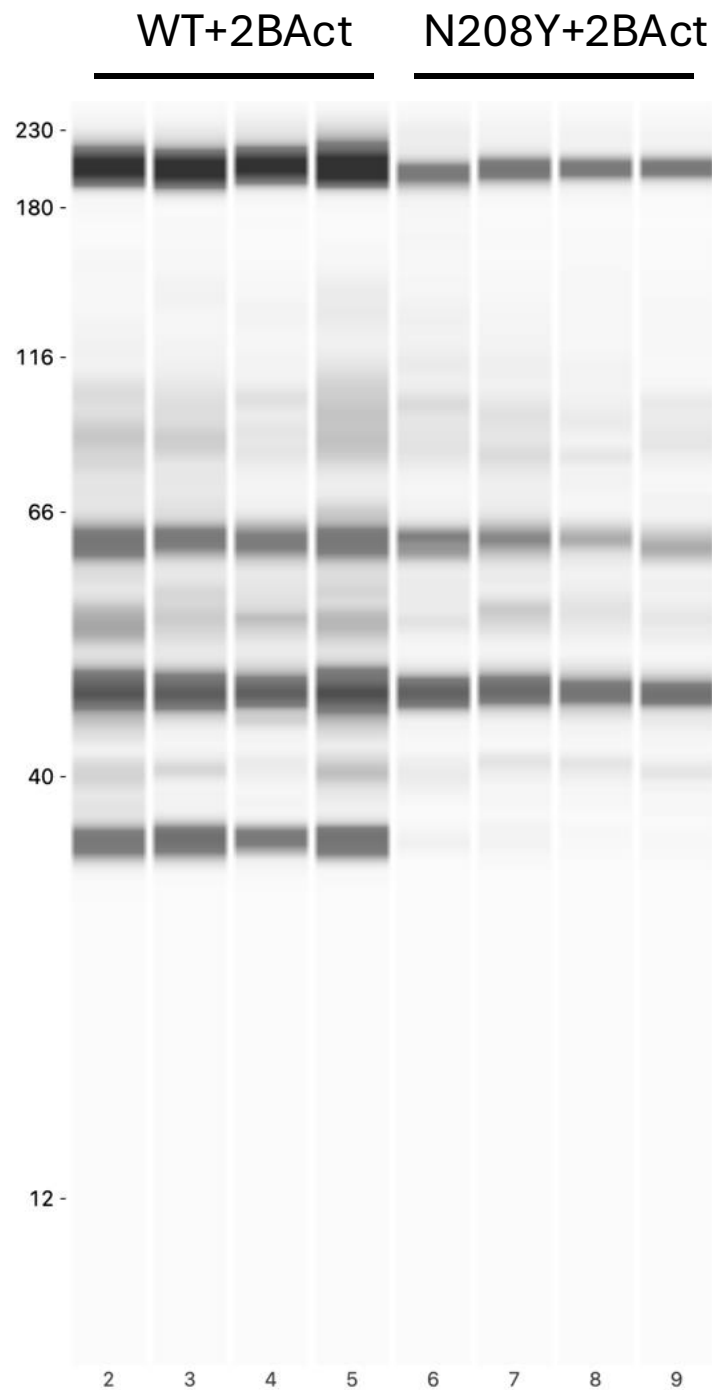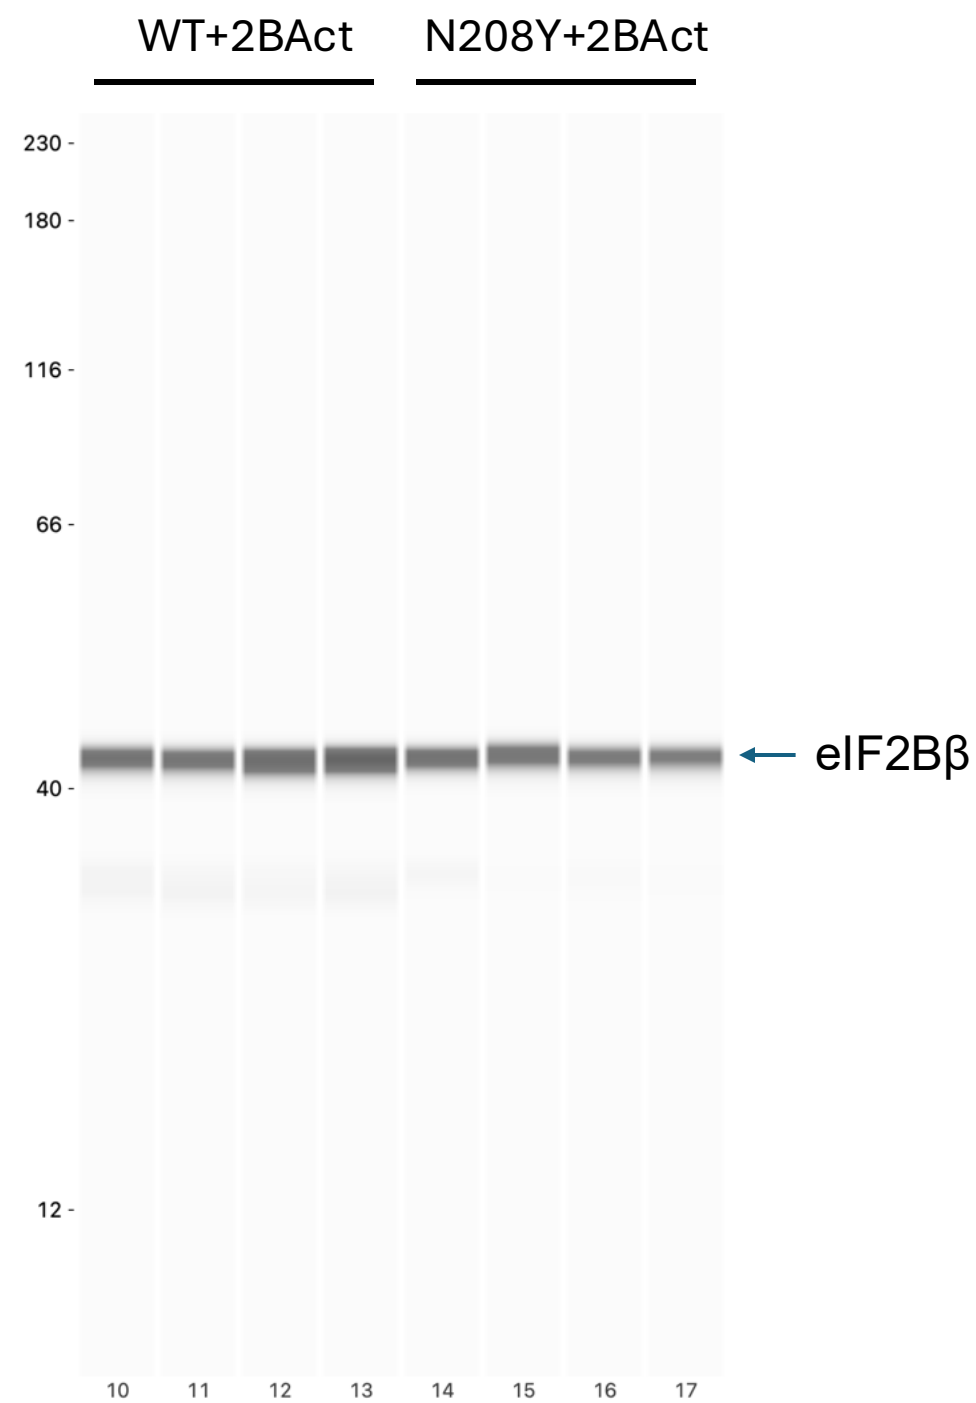

Full unedited blot for  
Supplement Figure 4D

Kidney

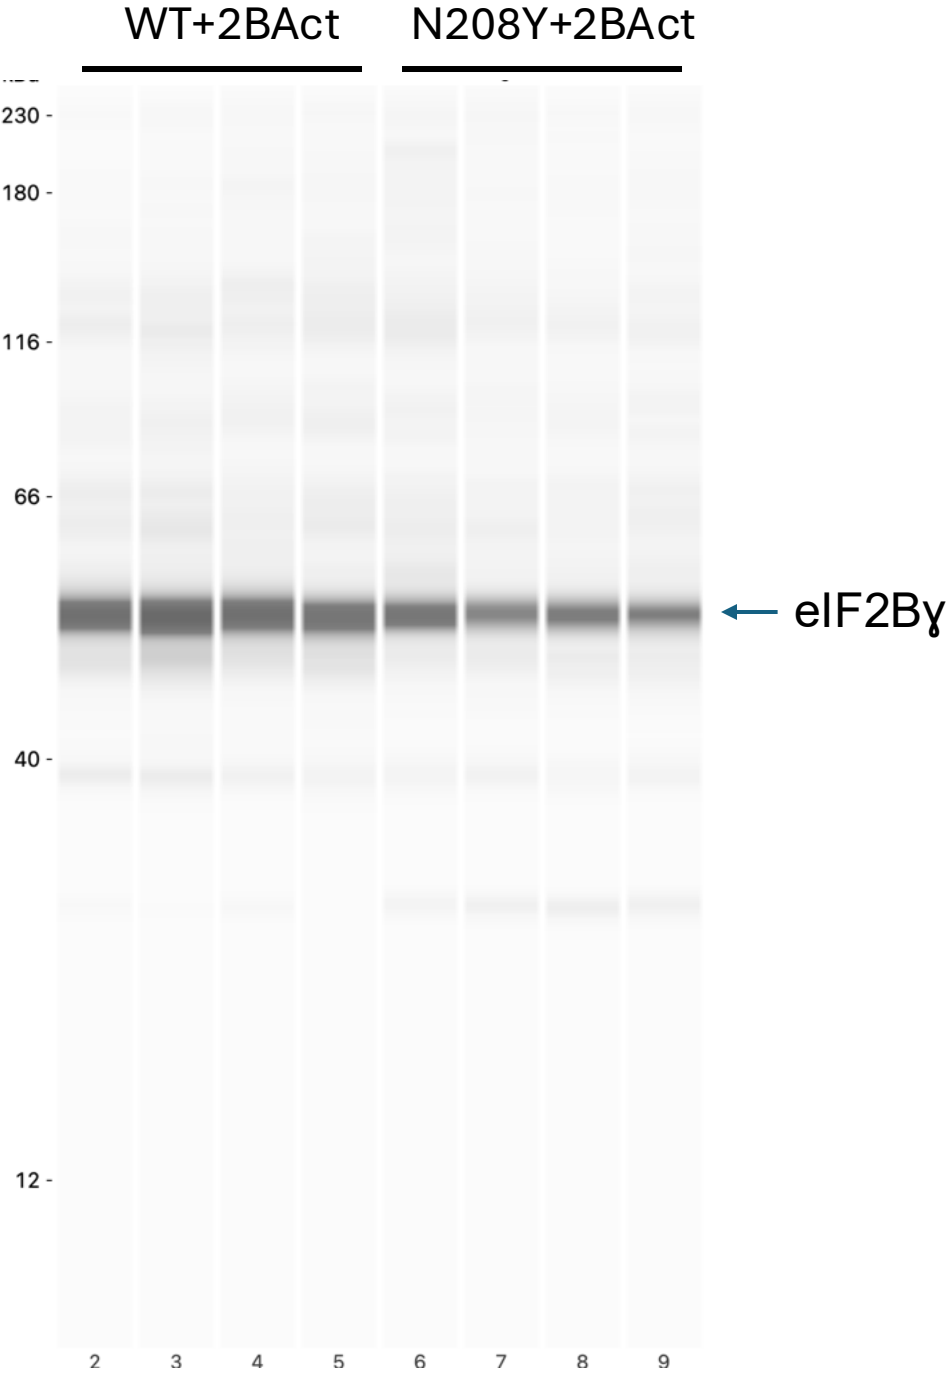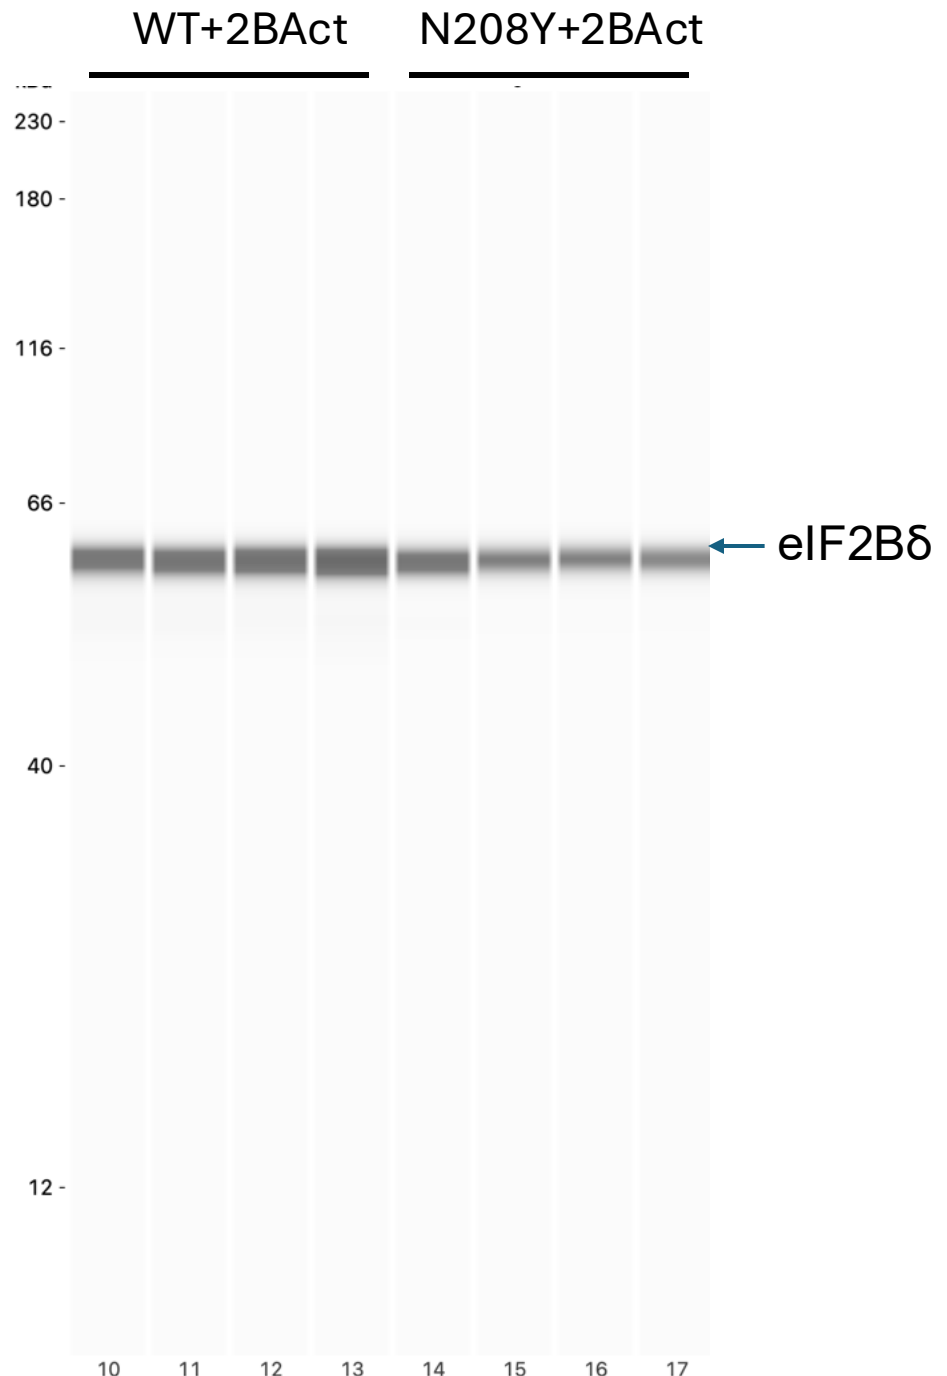

Full unedited blot for  
Supplement Figure 4D

Kidney

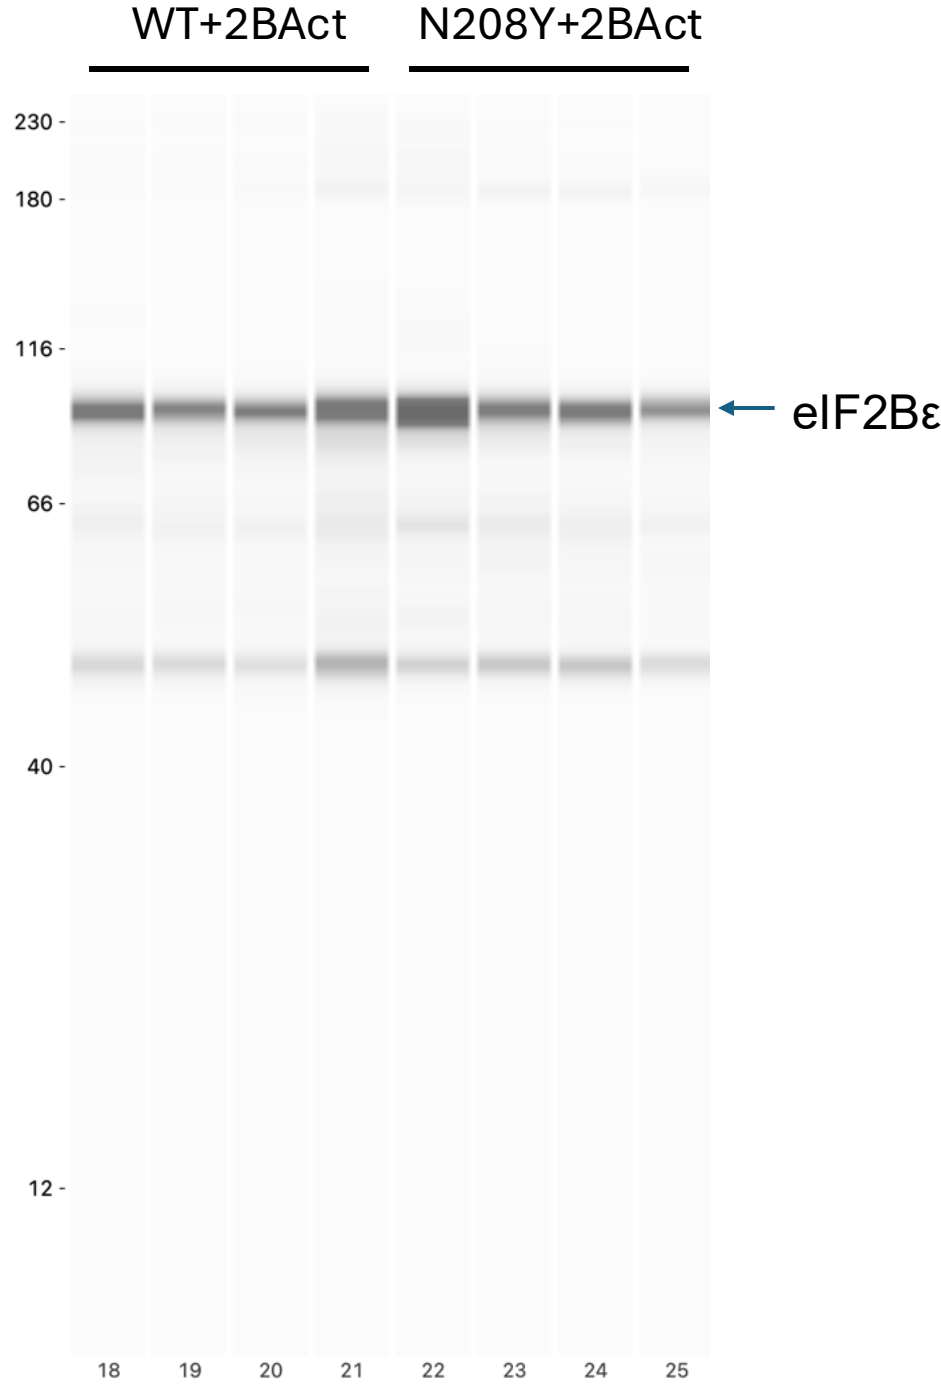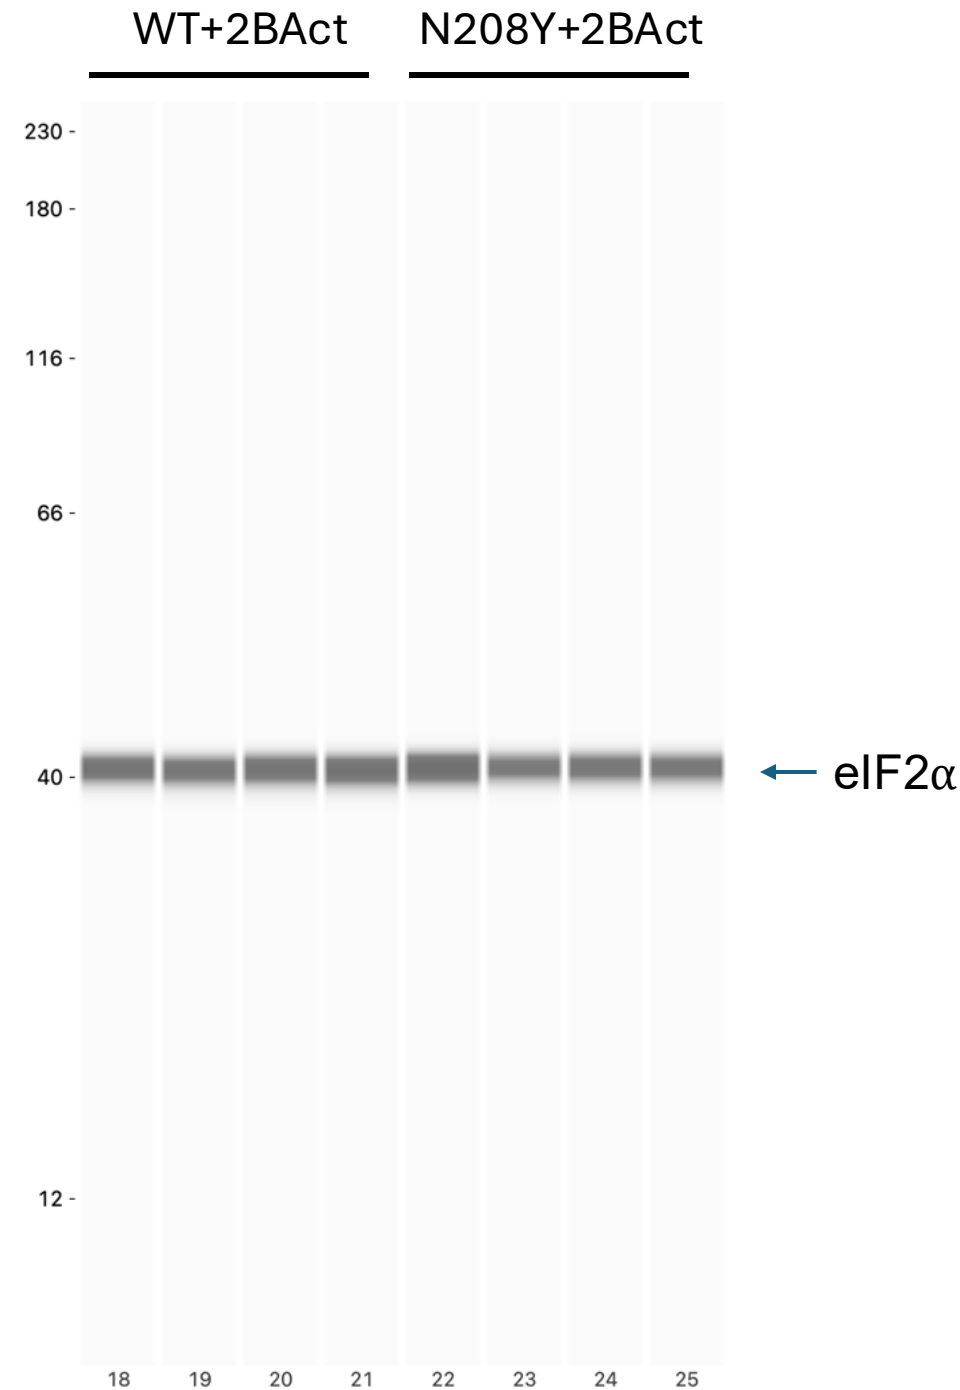

Full unedited blot for  
Supplement Figure 4D

Lung

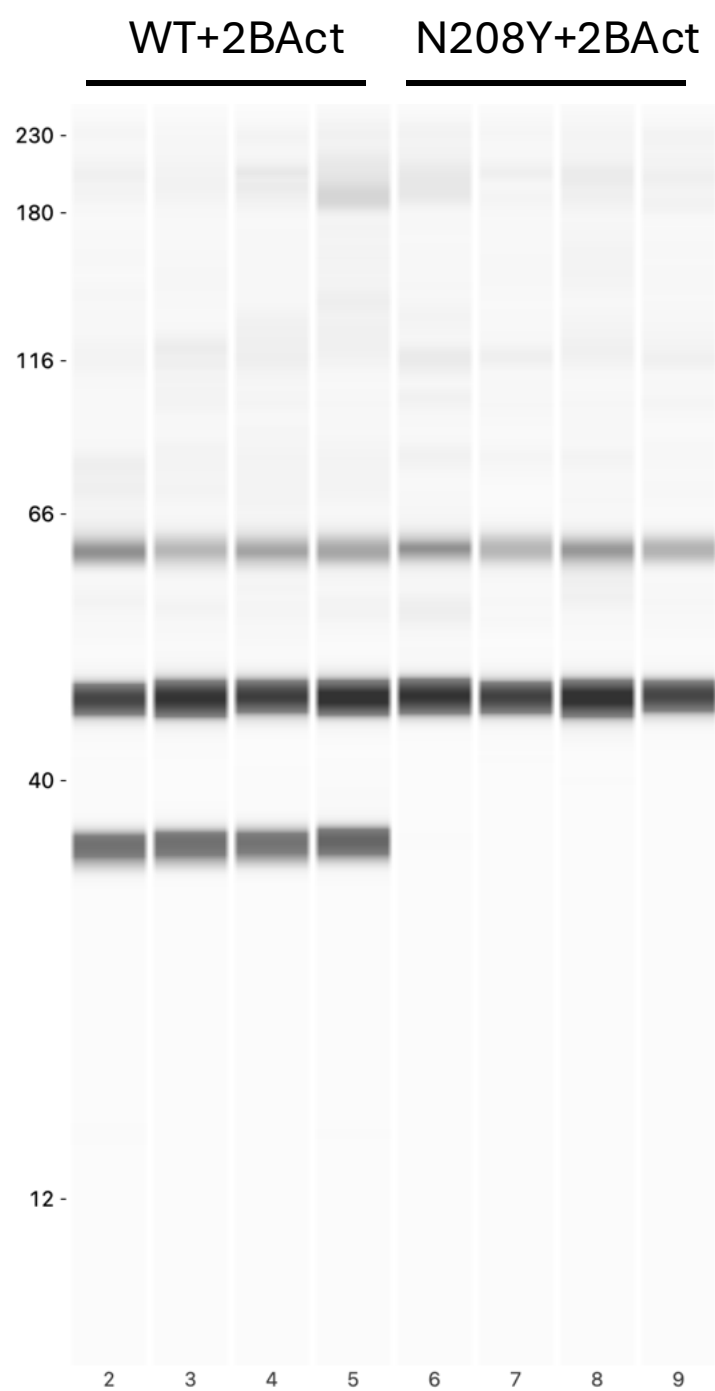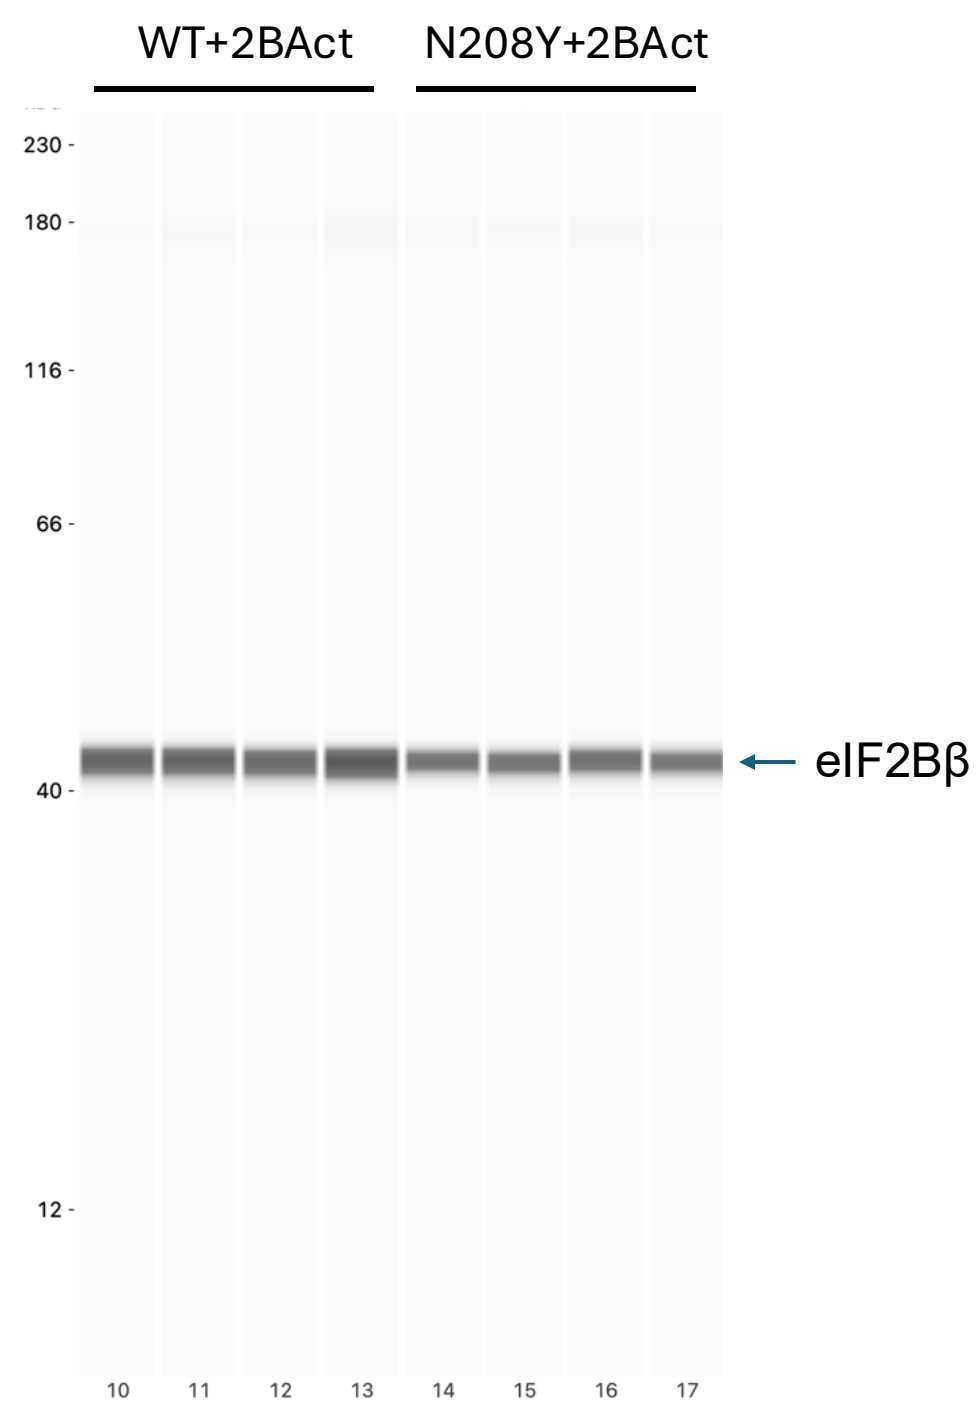

Full unedited blot for  
Supplement Figure 4D

Lung

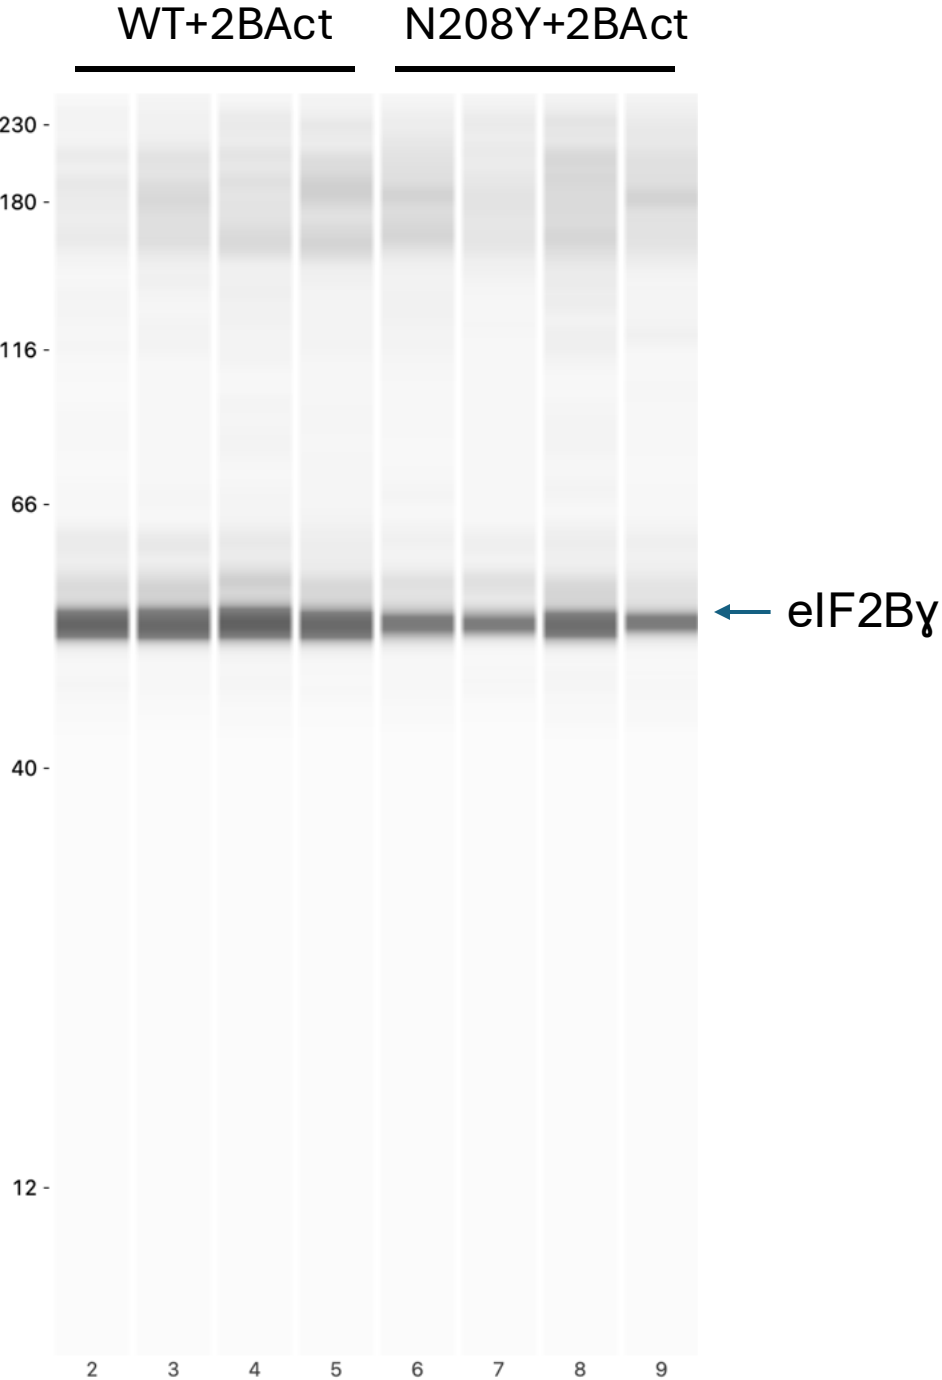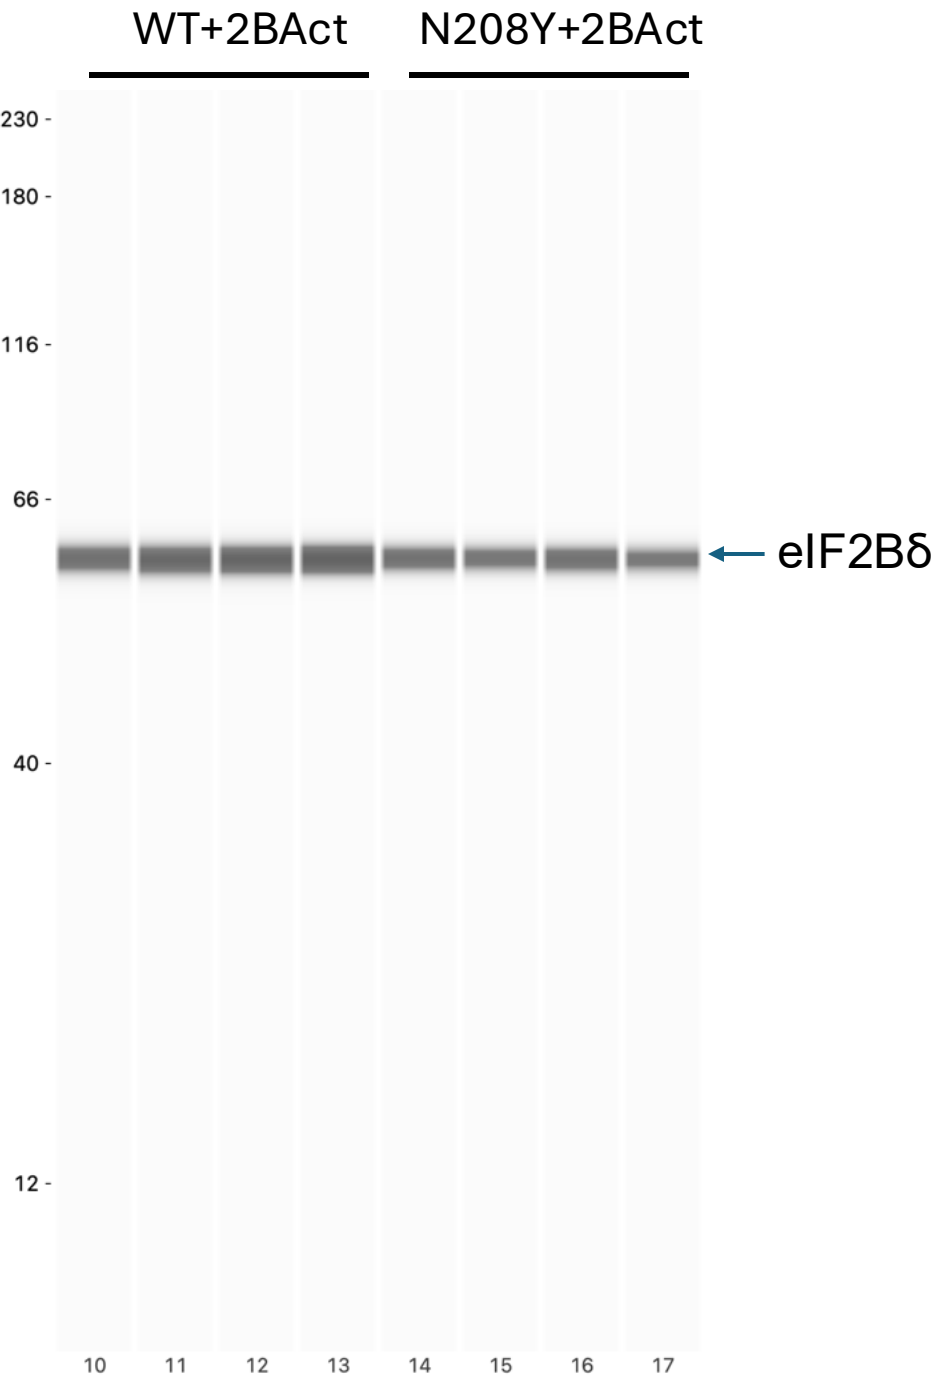



Full unedited blot for  
Supplement Figure 4D

Lung

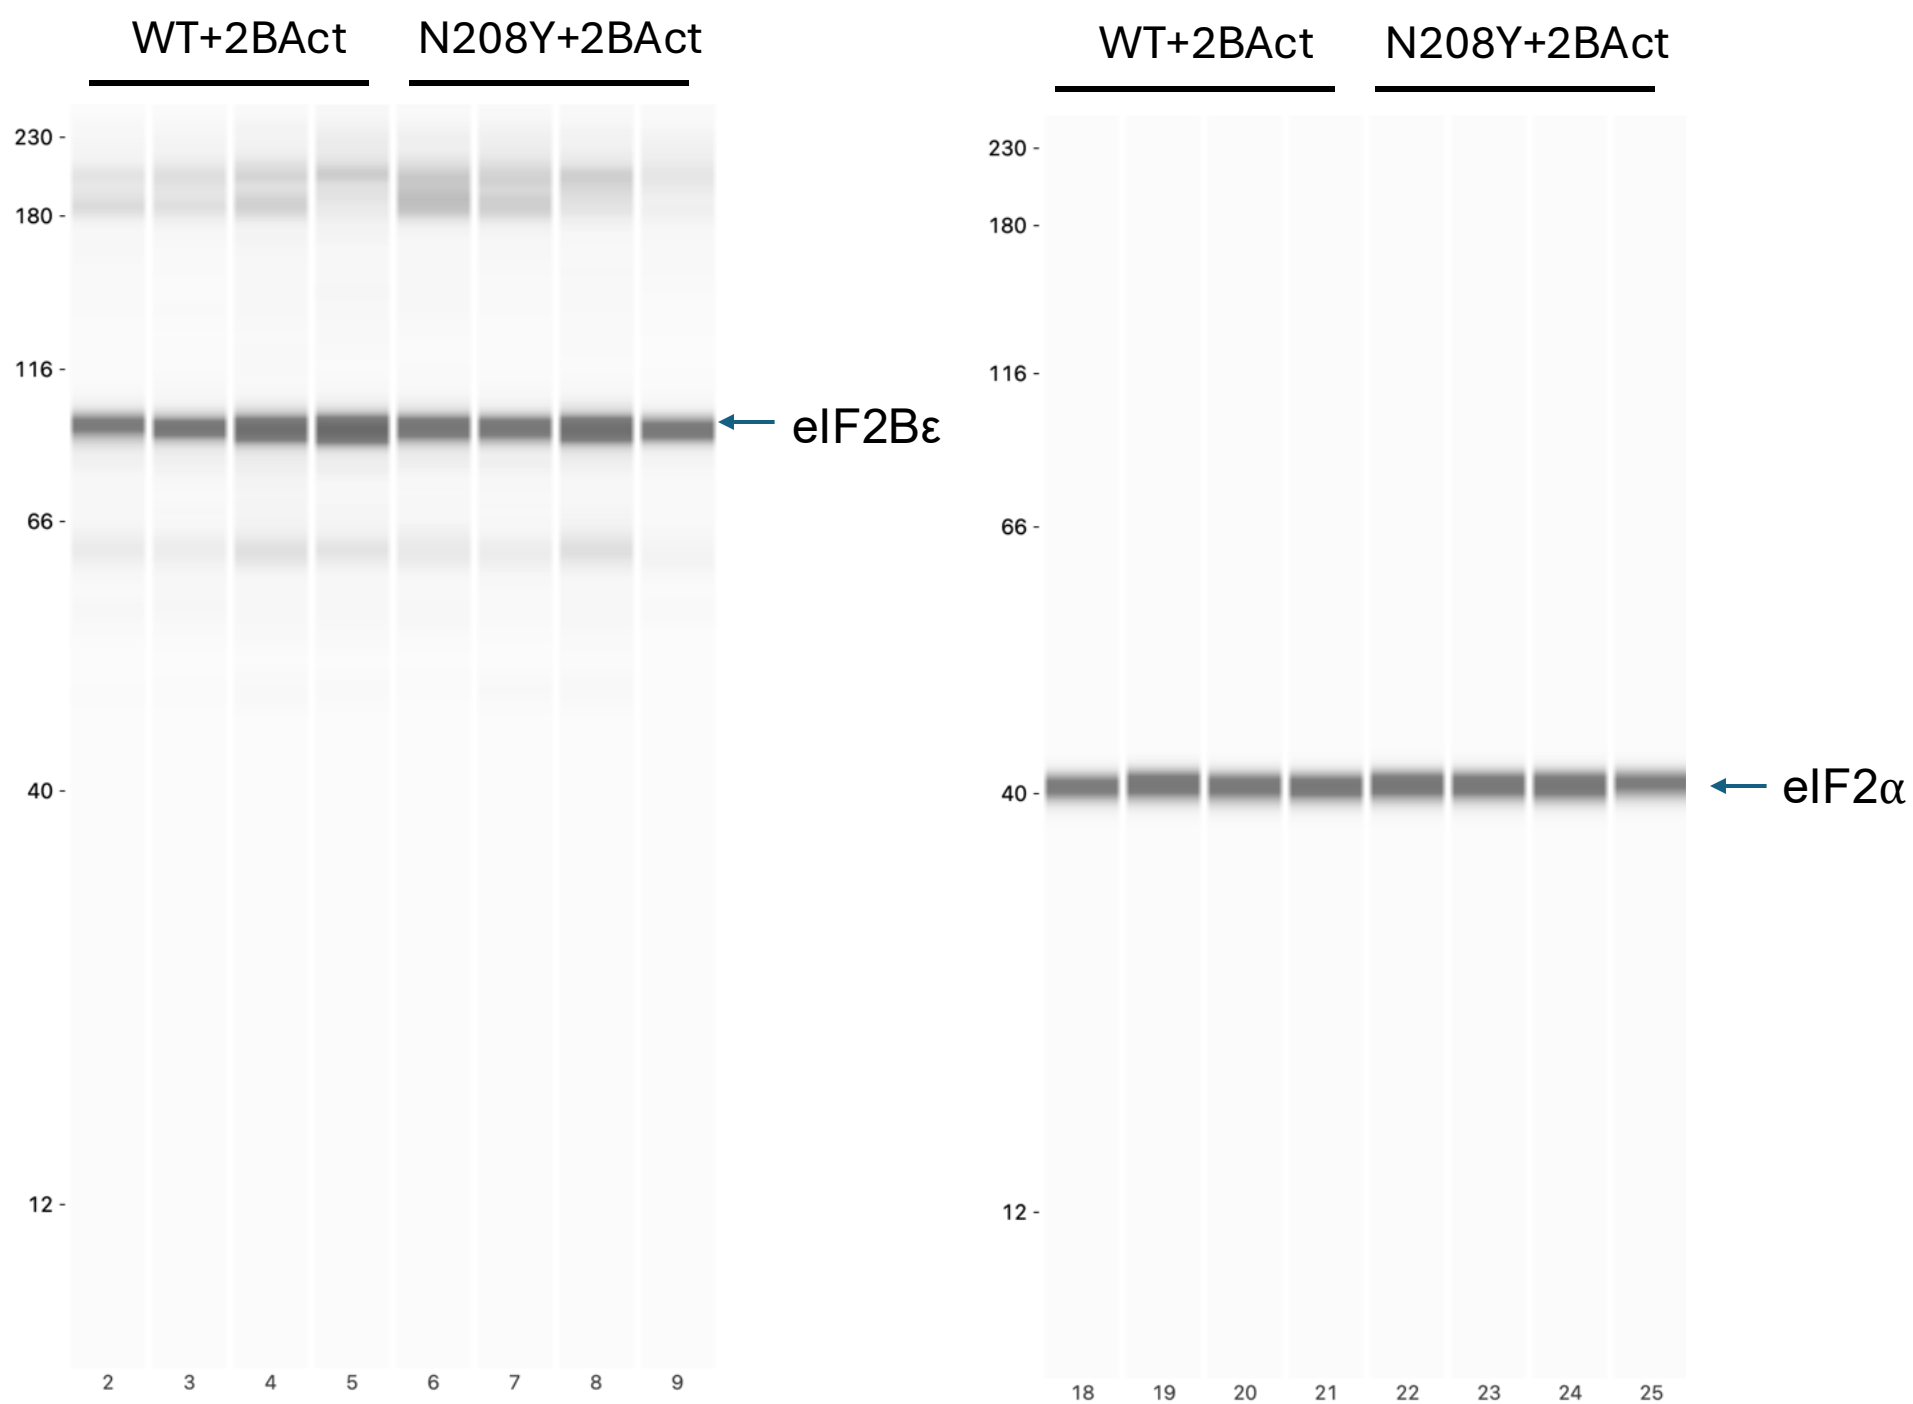

Full unedited blot for  
Supplement Figure10E

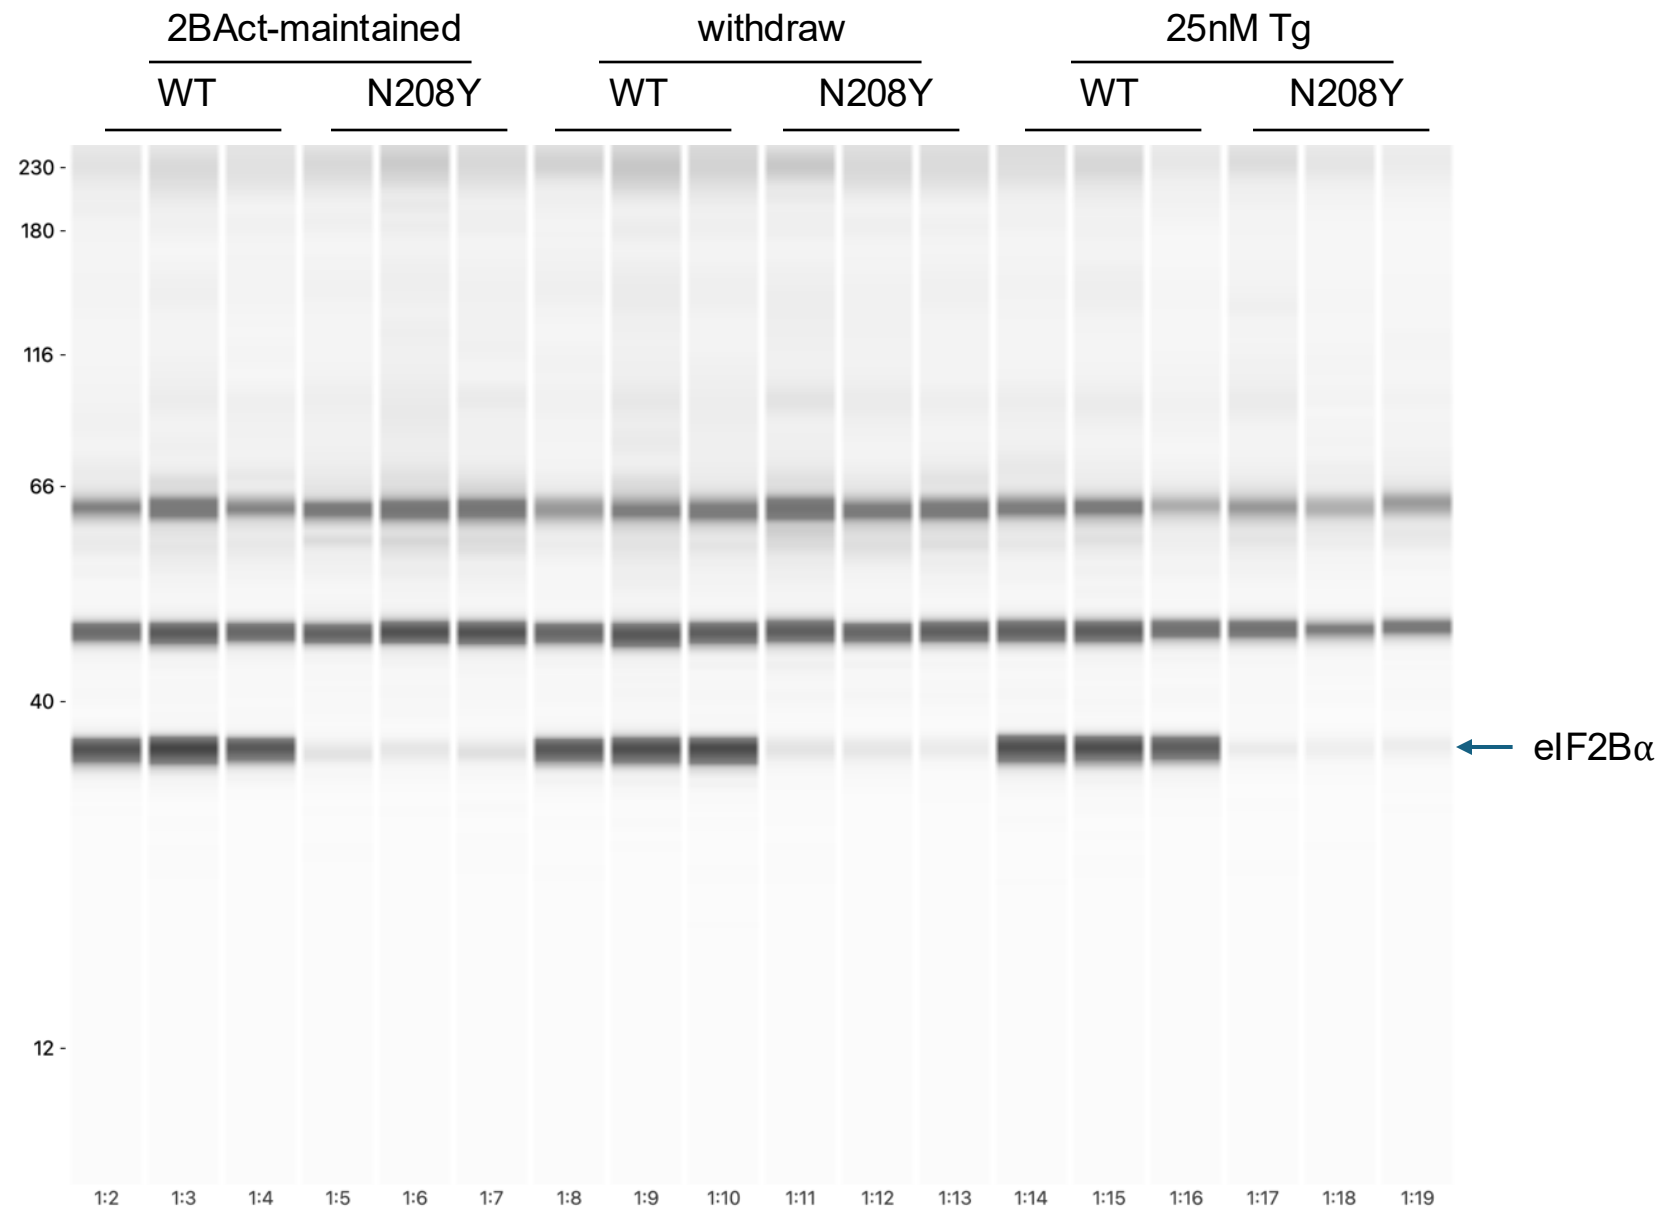

Full unedited blot for  
Supplement Figure10E

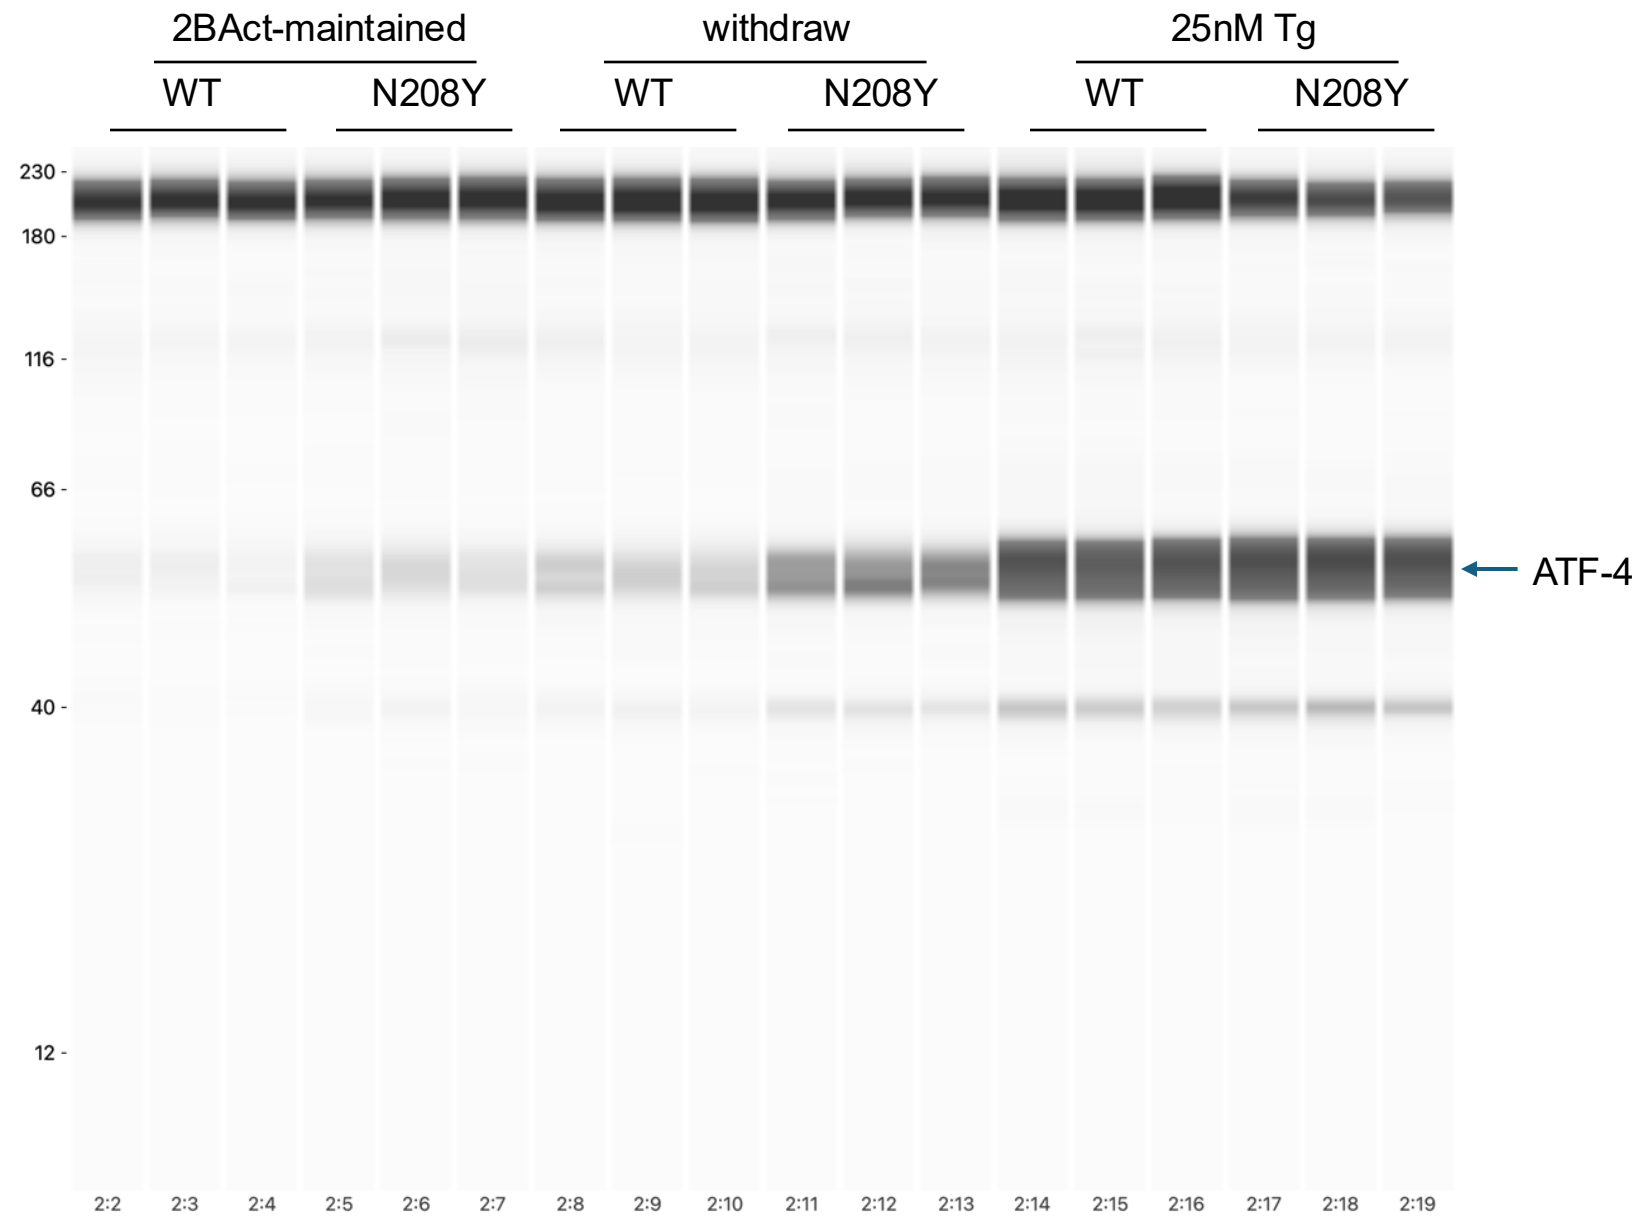

Full unedited blot for  
Supplement Figure10E

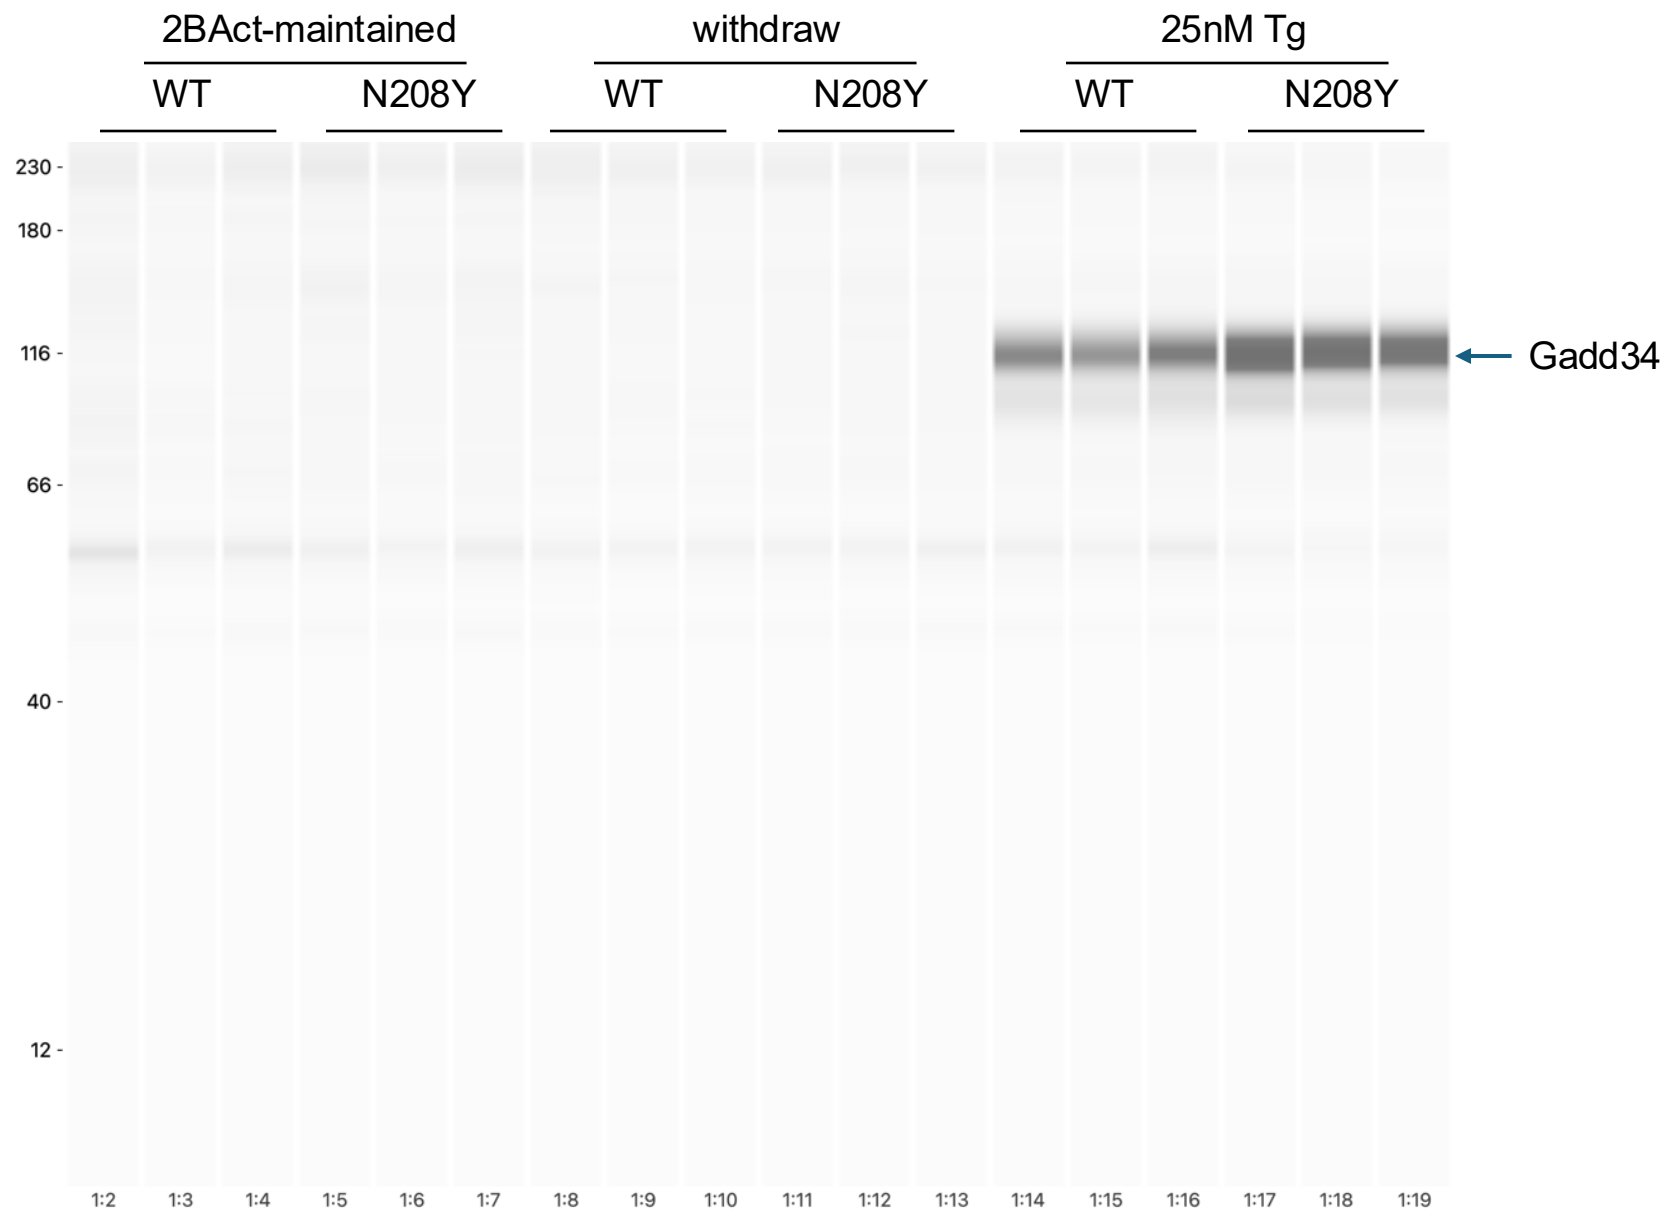

Full unedited blot for  
Supplement Figure10E

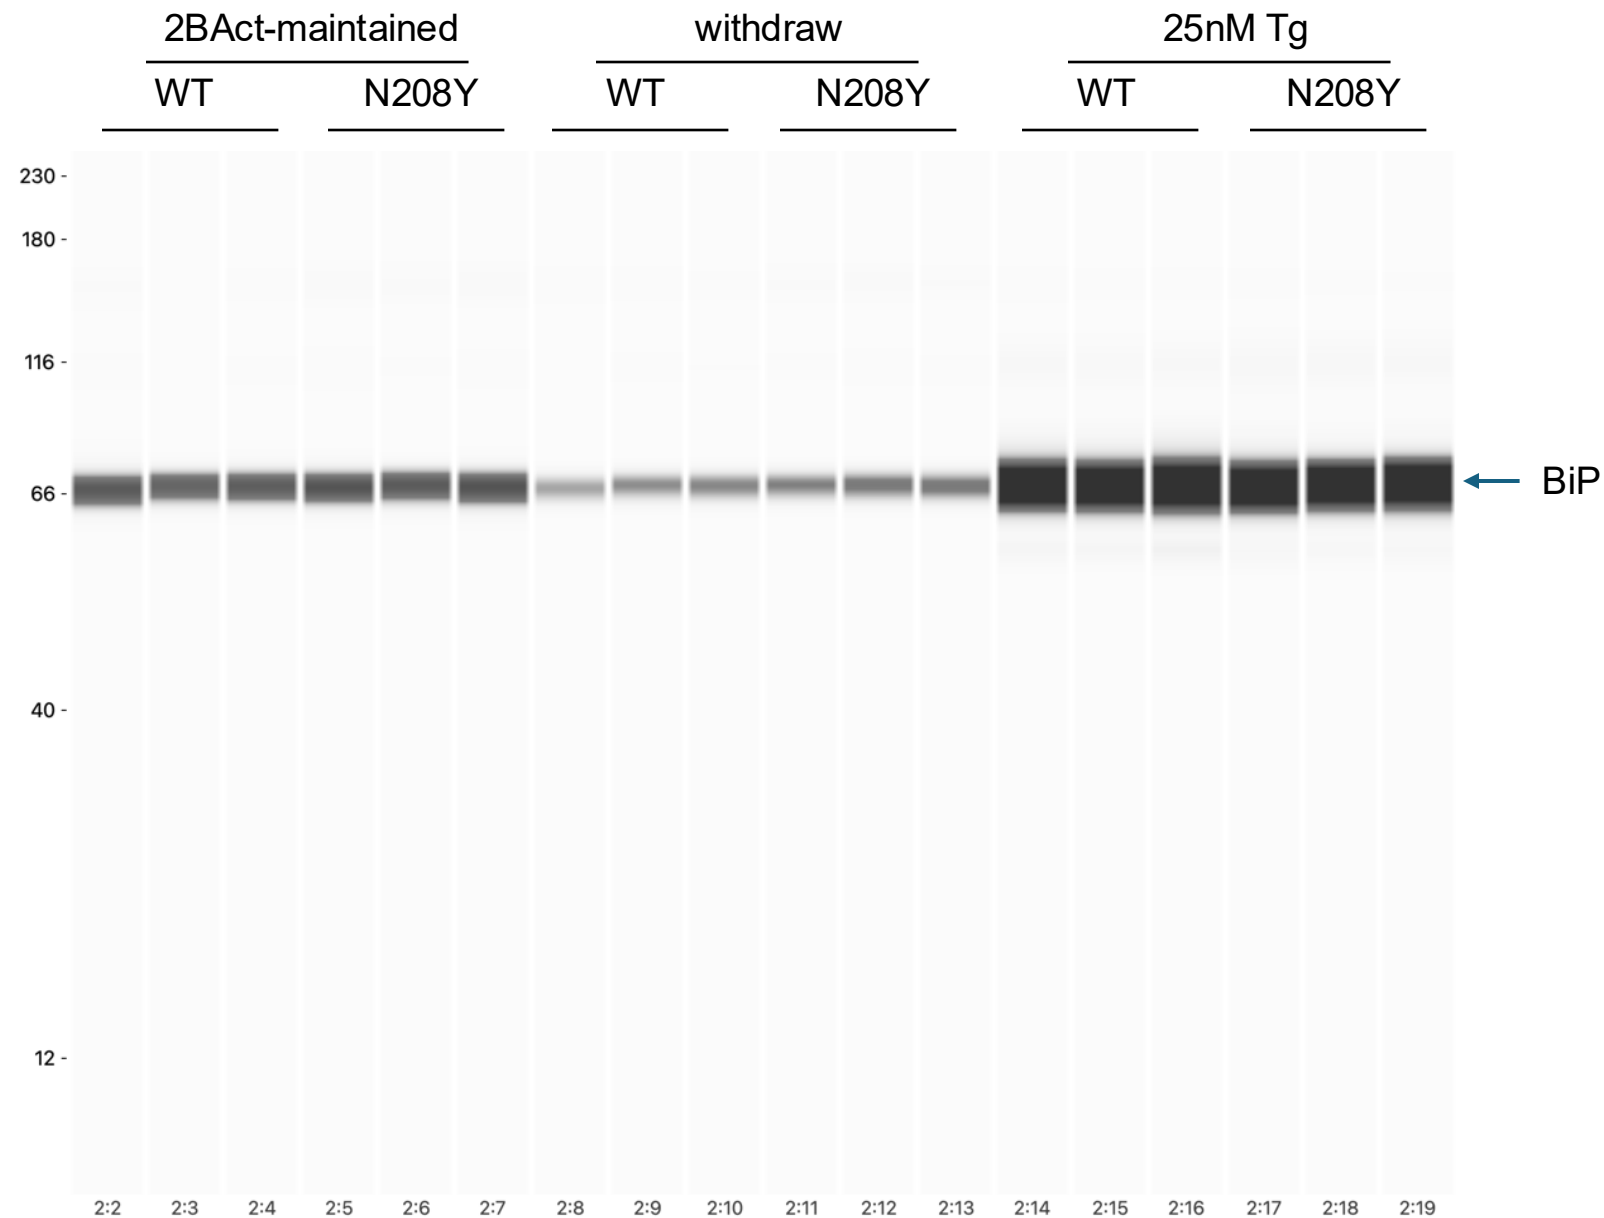

Full unedited blot for  
Supplement Figure10E

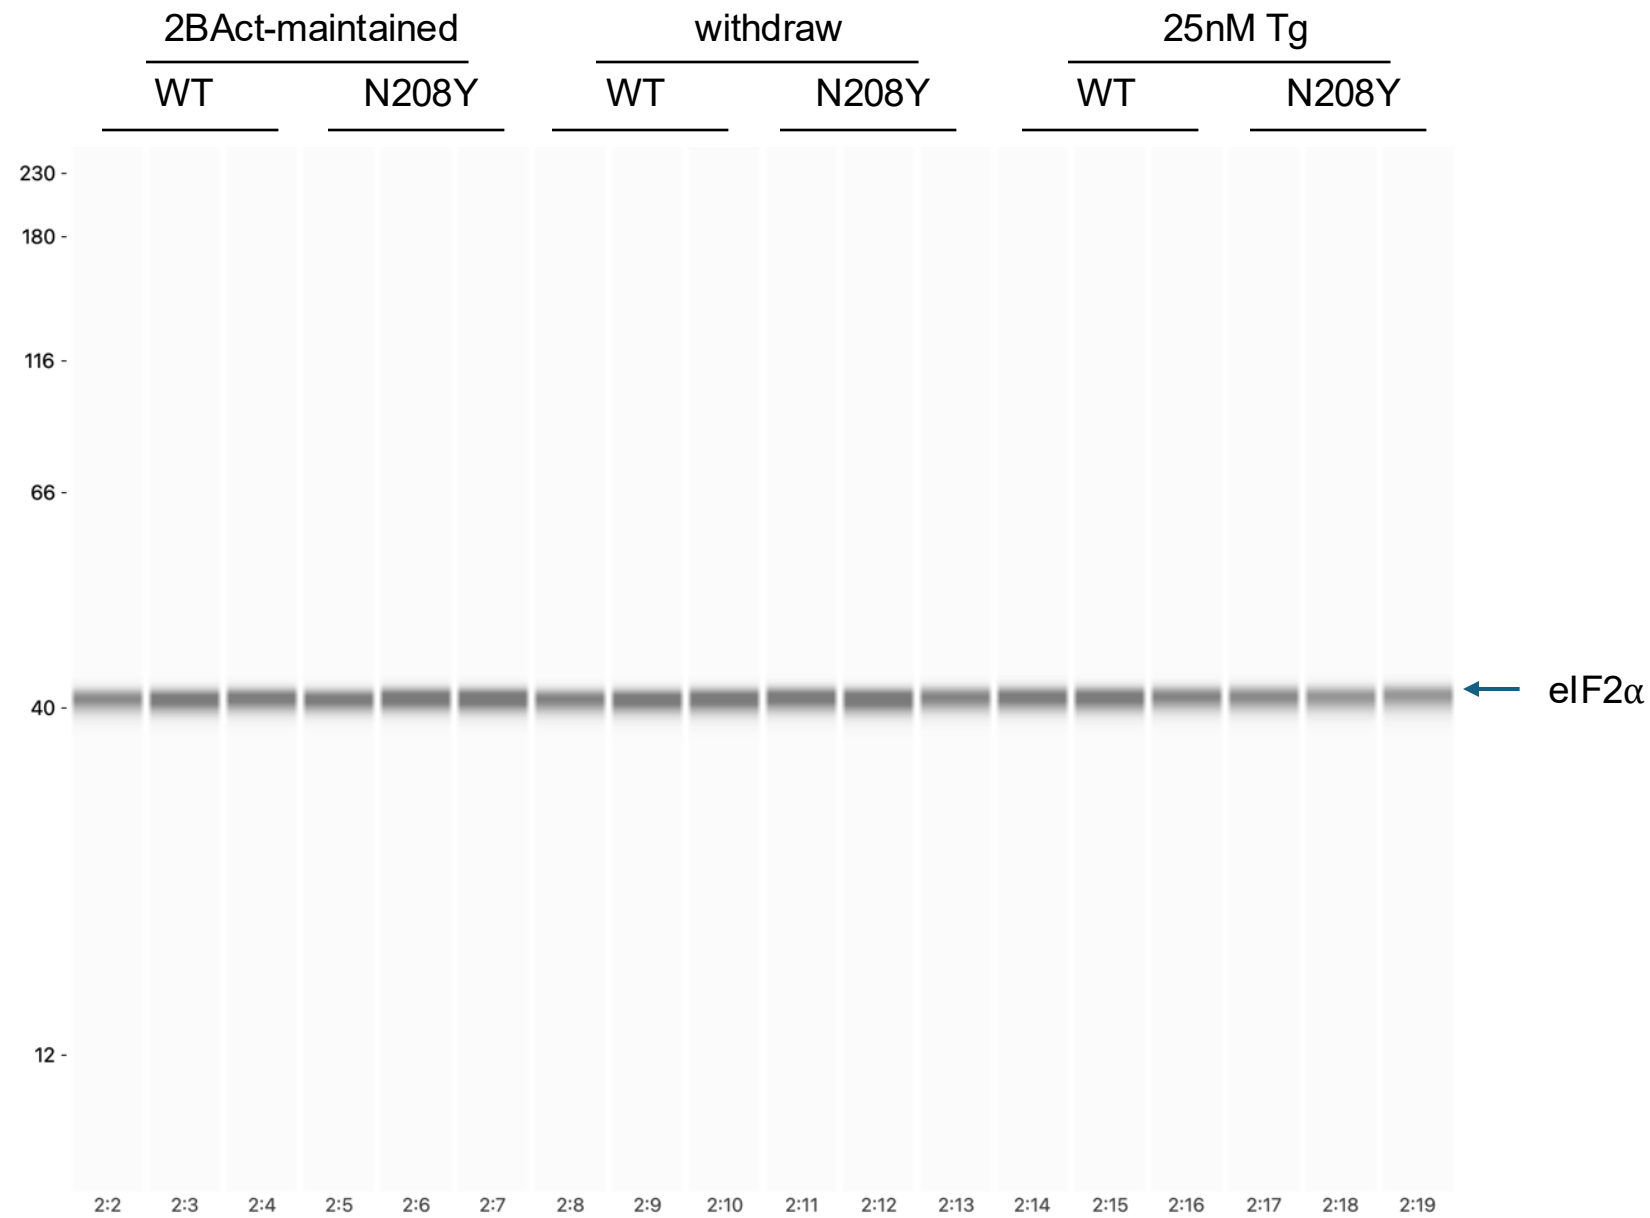

Supplement: sd2 [file 2]
